# Supplementary material for: Genome-scale reconstruction of the metabolic network in Staphylococcus aureus N315: an initial draft to the two-dimensional annotation
Source: PubMed Central journal article supplement (PMC1079855; doi:10.1186/1471-2180-5-8), 2005-03-07
Supplement: 1471-2180-5-8-S1.pdf [file 1471-2180-5-8-S1.pdf]

**Overview**

| Component            | % of Biomass |
|----------------------|--------------|
| Protein              | 60%          |
| RNA                  | 12%          |
| DNA                  | 3%           |
| Lipids               | 5%           |
| Lipoteichoic Acid    | 2%           |
| Cell Wall Components | 15%          |
| Trace Components     | 3%           |

**Full Description**

| Quantity | Compound Abbreviation | Compound Name                                                                          |
|----------|-----------------------|----------------------------------------------------------------------------------------|
| 0.01     | 10ftfh                | 10-Formyltetrahydrofolate (C20H21N7O7)                                                 |
| 0.42     | 12dgr_SA              | 1,2-Daicylglycerol (Saureus) (C1560H3065O42)                                           |
| 1.27     | 26dap-LL              | LL-2,6-Diaminoheptanedioate (C7H14N2O4)                                                |
| 0.01     | SA_FREE_FA            | SA Free Fatty Acids (X)                                                                |
| 0.38     | acgam                 | N-Acetyl-D-glucosamine (C8H15NO6)                                                      |
| 1.22     | acgam1p               | N-Acetyl-D-glucosamine 1-phosphate (C8H14NO9P)                                         |
| 6.6      | ala-L                 | L-Alanine (C3H7NO2)                                                                    |
| 3.11     | amp                   | AMP (C10H12N5O7P)                                                                      |
| 3.88     | arg-L                 | L-Arginine (C6H15N4O2)                                                                 |
| 4.48     | asn-L                 | L-Asparagine (C4H8N2O3)                                                                |
| 4.48     | asp-L                 | L-Aspartate (C4H6NO4)                                                                  |
| 20000    | atp                   | ATP (C10H12N5O13P3)                                                                    |
| 2.51     | clpn_SA               | Cardiolipin (Saureus) (C3270H6330O434P100)                                             |
| 2.2      | cmp                   | CMP (C9H12N3O8P)                                                                       |
| 0.79     | cys-L                 | L-Cysteine (C3H7NO2S)                                                                  |
| 0.76     | damp                  | dAMP (C10H12N5O6P)                                                                     |
| 0.53     | dcmp                  | dCMP (C9H12N3O7P)                                                                      |
| 0.012068 | dgdcg_SA2             | Diglucoyl-diacylglycerol (SA) 2 (C2160H4165O542)                                       |
| 0.6      | dgmp                  | dGMP (C10H12N5O7P)                                                                     |
| 0.73     | dtmp                  | dTMP (C10H13N2O8P)                                                                     |
| 0.01     | fad                   | FAD (C27H31N9O15P2)                                                                    |
| 0.23     | gam1p                 | D-Glucosamine 1-phosphate (C6H13NO8P)                                                  |
| 5.3      | glcp_SA               | Glucosyl Phosphoglycerol (SA) (C996H1868N62O1116P150)                                  |
| 8.72     | gln-L                 | L-Glutamine (C5H10N2O3)                                                                |
| 9.68     | glu-L                 | L-Glutamate (C5H8NO4)                                                                  |
| 3.51     | gly                   | Glycine (C2H5NO2)                                                                      |
| 4.01     | gmp                   | GMP (C10H12N5O8P)                                                                      |
| 20000    | h2o                   | H2O (H2O)                                                                              |
| 0.01     | hemeO                 | Heme O (C49H56FeN4O5)                                                                  |
| 1.45     | his-L                 | L-Histidine (C6H9N3O2)                                                                 |
| 4.06     | ile-L                 | L-Isoleucine (C6H13NO2)                                                                |
| 5.21     | leu-L                 | L-Leucine (C6H13NO2)                                                                   |
| 5.45     | lys-L                 | L-Lysine (C6H15N2O2)                                                                   |
| 1.94     | met-L                 | L-Methionine (C5H11NO2S)                                                               |
| 0.01     | mlthf                 | 5,10-Methylenetetrahydrofolate (C20H21N7O6)                                            |
| 0.01     | nad                   | Nicotinamide adenine dinucleotide (C21H26N7O14P2)                                      |
| 0.01     | nadp                  | Nicotinamide adenine dinucleotide phosphate (C21H25N7O17P3)                            |
| 0.01     | pala_SA2              | Phosphatidylalanine_SA2 (C1710H3315N50O242P50)                                         |
| 0.89     | pe_SA                 | Phosphatidylethanolamine (Saureus) (C1660H3365N50O192P50)                              |
| 2.31     | pg_SA                 | Phosphatidylglycerol (Saureus) (C1710H3365O292P50)                                     |
| 0.01     | pgly_SA2              | Phosphatidylglycine_SA2 (C1660H3215N50O242P50)                                         |
| 3.33     | phe-L                 | L-Phenylalanine (C9H11NO2)                                                             |
| 0.01     | pleu_SA2              | Phosphatidylleucine_SA2 (C1860H3615N50O242P50)                                         |
| 0.15     | plys_SA2              | Phosphatidyllysine_SA2 (C1860H3715N100O242P50)                                         |
| 2.12     | pro-L                 | L-Proline (C5H9NO2)                                                                    |
| 0.01     | ptrc                  | Putrescine (C4H14N2)                                                                   |
| 2.6      | ser-L                 | L-Serine (C3H7NO3)                                                                     |
| 0.01     | sheme                 | Siroheme (C42H36FeN4O16)                                                               |
| 0.01     | spmd                  | Spermidine (C7H22N3)                                                                   |
| 2.86     | tcam                  | minor teichoic acid (acetylgalactosamine glucose phosphate, n=30) (C420H750N30O420P30) |
| 0.01     | thf                   | 5,6,7,8-Tetrahydrofolate (C19H21N7O6)                                                  |
| 0.01     | thm                   | Thiamin (C12H17N4OS)                                                                   |
| 2.54     | thr-L                 | L-Threonine (C4H9NO3)                                                                  |
| 1.27     | trp-L                 | L-Tryptophan (C11H12N2O2)                                                              |
| 2.3      | tyr-L                 | L-Tyrosine (C9H11NO3)                                                                  |
| 1.78     | uamr                  | UDP-N-acetylmuramate (C20H28N3O19P2)                                                   |
| 2.39     | ump                   | UMP (C9H11N2O9P)                                                                       |
| 4.12     | val-L                 | L-Valine (C5H11NO2)                                                                    |
