# Supplementary material for: Genome-scale reconstruction of the metabolic network in Staphylococcus aureus N315: an initial draft to the two-dimensional annotation
Source: PubMed Central journal article supplement (PMC1079855; doi:10.1186/1471-2180-5-8), 2005-03-07
Supplement: 1471-2180-5-8-S2.pdf [file 1471-2180-5-8-S2.pdf]

| Compound Abbreviation | Compound Name                                                           |
|-----------------------|-------------------------------------------------------------------------|
| 10fthf                | 10-Formyltetrahydrofolate                                               |
| 12dag3p               | 1,2-Diacyl-sn-glycerol 3-phosphate                                      |
| 12dgr_EC              | 1,2-Diacylglycerol (E.coli)                                             |
| 12dgr_SA              | 1,2-Daicylglycerol (Saureus)                                            |
| 13dpg                 | 3-Phospho-D-glyceroyl phosphate                                         |
| 15dap                 | 1,5-Diaminopentane                                                      |
| 1pyr5c                | 1-Pyrroline-5-carboxylate                                               |
| 23ddhb                | 2,3-Dihydro-2,3-dihydroxybenzoate                                       |
| 23dhdp                | 2,3-Dihydrodipicolinate                                                 |
| 23dhmb                | (R)-2,3-Dihydroxy-3-methylbutanoate                                     |
| 23dhmp                | (R)-2,3-Dihydroxy-3-methylpentanoate                                    |
| 25aics                | (S)-2-[5-Amino-1-(5-phospho-D-ribose)]imidazole-4-carboxamido]succinate |
| 25dhpp                | 2,5-Diamino-6-hydroxy-4-(5'-phosphoribosylamino)-pyrimidine             |
| 26dap-LL              | LL-2,6-Diaminoheptanedioate                                             |
| 26dap-M               | meso-2,6-Diaminoheptanedioate                                           |
| 2a3pp                 | 2-Amino-3-phosphonopropanoate                                           |
| 2ahbut                | (S)-2-Aceto-2-hydroxybutanoate                                          |
| 2aobut                | L-2-Amino-3-oxobutanoate                                                |
| 2cpr5p                | 1-(2-Carboxyphenylamino)-1-deoxy-D-ribulose 5-phosphate                 |
| 2dda7p                | 2-Dehydro-3-deoxy-D-arabino-heptonate 7-phosphate                       |
| 2dhp                  | 2-Dehydropantoate                                                       |
| 2dmmq8                | 2-Demethylmenaquinone 8                                                 |
| 2dmmq18               | 2-Demethylmenaquinol 8                                                  |
| 2dr1p                 | 2-Deoxy-D-ribose 1-phosphate                                            |
| 2dr5p                 | 2-Deoxy-D-ribose 5-phosphate                                            |
| 2hymeph               | 2-(Hydroxymethyl)phenol                                                 |
| 2ippm                 | 2-Isopropylmaleate                                                      |
| 2kmb                  | 2-keto-4-methylthiobutyrate                                             |
| 2mahmp                | 2-Methyl-4-amino-5-hydroxymethylpyrimidine diphosphate                  |
| 2mbcoa                | 2-Methylbutanoyl-CoA                                                    |
| 2mbdhl                | S-(2-Methylbutanoyl)-dihydrolipoamide                                   |
| 2me4p                 | 2-C-methyl-D-erythritol 4-phosphate                                     |
| 2mpdhl                | S-(2-Methylpropanoyl)-dihydrolipoamide                                  |
| 2obut                 | 2-Oxobutanoate                                                          |
| 2ombz                 | 2-Octaprenyl-6-methoxy-1,4-benzoquinone                                 |
| 2ommb                 | 2-Octaprenyl-3-methyl-6-methoxy-1,4-benzoquinone                        |
| 2p4c2me               | 2-phospho-4-(cytidine 5'-diphospho)-2-C-methyl-D-erythritol             |
| 2pg                   | D-Glycerate 2-phosphate                                                 |
| 2pglyc                | 2-Phosphoglycolate                                                      |
| 2shchc                | 2-Succinyl-6-hydroxy-2,4-cyclohexadiene-1-carboxylate                   |
| 34hpp                 | 3-(4-Hydroxyphenyl)pyruvate                                             |
| 3AStmyn               | 3"-Adenylylstreptomycin                                                 |
| 3AStrmyn              | 3"-Adenylylspectinomycin                                                |
| 3R3haACP              | (3R)-3-Hydroxyacyl-[acyl-carrier protein]                               |
| 3c2hmp                | 3-Carboxy-2-hydroxy-4-methylpentanoate                                  |
| 3c3hmp                | 3-Carboxy-3-hydroxy-4-methylpentanoate                                  |
| 3c4mop                | 3-Carboxy-4-methyl-2-oxopentanoate                                      |
| 3dhq                  | 3-Dehydroquininate                                                      |
| 3dhsk                 | 3-Dehydroshikimate                                                      |
| 3g12dgr_SA            | 3-D-Glucosyl-1,2-diacylglycerol                                         |
| 3g12dgr_SA2           | 3-D-Glucosyl-1,2-diacylglycerol                                         |
| 3hbcoa                | (S)-3-Hydroxybutyryl-CoA                                                |
| 3hdcoa                | (S)-3-Hydroxydecanoyl-CoA                                               |
| 3hddcoa               | (S)-3-Hydroxydodecanoyl-CoA                                             |
| 3hhcoa                | (S)-3-Hydroxyhexanoyl-CoA                                               |
| 3hhdcoa               | (S)-3-Hydroxyhexadecanoyl-CoA                                           |
| 3hmrsACP              | R-3-hydroxy-myristoyl-ACP                                               |
| 3hcoa                 | (S)-3-Hydroxyoctanoyl-CoA                                               |
| 3htdcoa               | (S)-3-Hydroxytetradecanoyl-CoA                                          |
| 3ig3p                 | C'-(3-Indolyl)-glycerol 3-phosphate                                     |
| 3mbdhl                | S-(3-Methylbutanoyl)-dihydrolipoamide                                   |
| 3mob                  | 3-Methyl-2-oxobutanoate                                                 |
| 3mop                  | (S)-3-Methyl-2-oxopentanoate                                            |
| 3odcoa                | 3-Oxodecanoyl-CoA                                                       |
| 3oddcoa               | 3-Oxododecanoyl-CoA                                                     |
| 3ohcoa                | 3-Oxohexanoyl-CoA                                                       |
| 3ohdcoa               | 3-Oxohexadecanoyl-CoA                                                   |
| 3oocoa                | 3-Oxoctanoyl-CoA                                                        |
| 3otdcoa               | 3-Oxotetradecanoyl-CoA                                                  |
| 3oxoACP_delete        | 3-Oxoacyl-[acyl-carrier protein]                                        |
| 3pg                   | 3-Phospho-D-glycerate                                                   |
| 3php                  | 3-Phosphohydroxypyruvate                                                |
| 3pop                  | 3-Phosphonopyruvate                                                     |
| 3psme                 | 5-O-(1-Carboxyvinyl)-3-phosphoshikimate                                 |
| 4abut                 | 4-Aminobutanoate                                                        |
| 4abz                  | 4-Aminobenzoate                                                         |

|                                  |                                                                                   |
|----------------------------------|-----------------------------------------------------------------------------------|
| 4adcho                           | 4-amino-4-deoxychorismate                                                         |
| 4ampm                            | 4-Amino-2-methyl-5-phosphomethylpyrimidine                                        |
| 4c2me                            | 4-(cytidine 5'-diphospho)-2-C-methyl-D-erythritol                                 |
| 4izp                             | 4-Imidazolone-5-propanoate                                                        |
| 4mhztz                           | 4-Methyl-5-(2-hydroxyethyl)-thiazole                                              |
| 4mop                             | 4-Methyl-2-oxopentanoate                                                          |
| 4mpetz                           | 4-Methyl-5-(2-phosphoethyl)-thiazole                                              |
| 4pasp                            | 4-Phospho-L-aspartate                                                             |
| 4ppan                            | D-4'-Phosphopantothenate                                                          |
| 4ppcys                           | N-((R)-4-Phosphopantothenoyl)-L-cysteine                                          |
| 4r5au                            | 4-(1-D-Ribitylamino)-5-aminouracil                                                |
| 5aizc                            | 5-amino-1-(5-phospho-D-ribose)imidazole-4-carboxylate                             |
| 5aop                             | 5-Amino-4-oxopentanoate                                                           |
| 5aprbu                           | 5-Amino-6-(5'-phosphoribitylamino)uracil                                          |
| 5apru                            | 5-Amino-6-(5'-phosphoribosylamino)uracil                                          |
| 5caiz                            | 5-phosphoribosyl-5-carboxyaminoimidazole                                          |
| 5dpmev                           | (R)-5-Diphosphomevalonate                                                         |
| 5mdr1p                           | 5-Methylthio-5-deoxy-D-ribose 1-phosphate                                         |
| 5mdru1p                          | 5-Methylthio-5-deoxy-D-ribose 1-phosphate                                         |
| 5mta                             | 5-Methylthioadenosine                                                             |
| 5mthf                            | 5-Methyltetrahydrofolate                                                          |
| 5mtr                             | 5-Methylthio-D-ribose                                                             |
| 5pmev                            | (R)-5-Phosphomevalonate                                                           |
| 6hmhpt                           | 6-hydroxymethyl dihydropterin                                                     |
| 6hmhptpp                         | 6-hydroxymethyl-dihydropterin pyrophosphate                                       |
| 6pgc                             | 6-Phospho-D-gluconate                                                             |
| 6pgl                             | 6-phospho-D-glucono-1,5-lactone                                                   |
| 6pthp                            | 6-Pyruvoyl-5,6,7,8-tetrahydropterin                                               |
| 8aonn                            | 8-Amino-7-oxononanoate                                                            |
| ACP                              | acyl carrier protein                                                              |
| Cit-Mg                           | Citrate-Mg                                                                        |
| DGDG_SA                          | Diglycosyl Diglyceride (SA)                                                       |
| Lac6p                            | Lactose-6-phosphate                                                               |
| SA_FREE_FA                       | SA Free Fatty Acids                                                               |
| Sptmyn                           | Spectinomycin                                                                     |
| Stmyn                            | Streptomycin                                                                      |
| aacoa                            | Acetoacetyl-CoA                                                                   |
| ac                               | Acetate                                                                           |
| acACP                            | Acetyl-ACP                                                                        |
| acald                            | Acetaldehyde                                                                      |
| accoa                            | Acetyl-CoA                                                                        |
| acg5p                            | N-Acetyl-L-glutamyl 5-phosphate                                                   |
| acg5sa                           | N-Acetyl-L-glutamate 5-semialdehyde                                               |
| acgam                            | N-Acetyl-D-glucosamine                                                            |
| acgam1p                          | N-Acetyl-D-glucosamine 1-phosphate                                                |
| acgam6p                          | N-Acetyl-D-glucosamine 6-phosphate                                                |
| acglu                            | N-Acetyl-L-glutamate                                                              |
| achms                            | O-Acetyl-L-homoserine                                                             |
| acmalt                           | Acetyl-maltose                                                                    |
| acmam                            | N-Acetyl-D-muramoate                                                              |
| acmama                           | N-Acetyl-D-muramoyl-L-alanine                                                     |
| acmana                           | N-Acetyl-D-mannosamine                                                            |
| acmanap                          | N-Acetyl-D-mannosamine 6-phosphate                                                |
| acnam                            | N-Acetylneuraminate                                                               |
| acorn                            | N2-Acetyl-L-ornithine                                                             |
| acser                            | O-Acetyl-L-serine                                                                 |
| actACP                           | Acetoacetyl-ACP                                                                   |
| actn-R                           | (R)-Acetoin                                                                       |
| actp                             | Acetyl phosphate                                                                  |
| adcobdam                         | Adenosyl cobyrrinate diamide                                                      |
| adcobhex                         | adenosyl-cobyric acid                                                             |
| ade                              | Adenine                                                                           |
| adn                              | Adenosine                                                                         |
| adp                              | ADP                                                                               |
| adpglc                           | ADPglucose                                                                        |
| adpheap-D,D                      | ADP-D-glycero-D-manno-heptose                                                     |
| adpheap-L,D                      | ADP-L-glycero-D-manno-heptose                                                     |
| adprib                           | ADPribose                                                                         |
| agm                              | Agmatine                                                                          |
| ahcys                            | S-Adenosyl-L-homocysteine                                                         |
| ahdt                             | 2-Amino-4-hydroxy-6-(erythro-1,2,3-trihydroxypropyl)dihydropteridine triphosphate |
| ahdt_#1 [deleted 07/14/2004 02:2 | 2-Amino-4-hydroxy-6-(erythro-1,2,3-trihydroxypropyl)dihydropteridine triphosphate |
| aicar                            | 5-Amino-1-(5-Phospho-D-ribose)imidazole-4-carboxamide                             |
| air                              | 5-amino-1-(5-phospho-D-ribose)imidazole                                           |
| akg                              | 2-Oxoglutarate                                                                    |
| ala-B                            | beta-Alanine                                                                      |
| ala-D                            | D-Alanine                                                                         |

|           |                                        |
|-----------|----------------------------------------|
| ala-L     | L-Alanine                              |
| alaala    | D-Alanyl-D-alanine                     |
| alac-S    | (S)-2-Acetolactate                     |
| alatrna   | L-Alanyl-tRNA(Ala)                     |
| alpro     | S-Aminomethylidihydrolypoylprotein     |
| amet      | S-Adenosyl-L-methionine                |
| ametam    | S-Adenosylmethioninamine               |
| amob      | S-Adenosyl-4-methylthio-2-oxobutanoate |
| amp       | AMP                                    |
| anth      | Anthranilate                           |
| apoACP    | apoprotein [acyl carrier protein]      |
| aps       | Adenosine 5'-phosphosulfate            |
| ara5p     | D-Arabinose 5-phosphate                |
| arg-L     | L-Arginine                             |
| argsuc    | N(omega)-(L-Arginino)succinate         |
| argtrna   | L-Arginyl-tRNA(Arg)                    |
| asn-L     | L-Asparagine                           |
| asnrna    | L-Asparaginyl-tRNA(Asn)                |
| asp-L     | L-Aspartate                            |
| aspsa     | L-Aspartate 4-semialdehyde             |
| asptrna   | L-Aspartyl-tRNA(Asp)                   |
| atp       | ATP                                    |
| b2coa     | trans-But-2-enoyl-CoA                  |
| betald    | Betaine aldehyde                       |
| bgly      | N-Benzoylglycine                       |
| btamp     | Biotinyl-5'-AMP                        |
| btcoa     | Butanoyl-CoA                           |
| btn       | Biotin                                 |
| bz        | Benzoate                               |
| cbasp     | N-Carbamoyl-L-aspartate                |
| cbp       | Carbamoyl phosphate                    |
| cdp       | CDP                                    |
| cdpdag    | CDPdiacylglycerol                      |
| cdpdag_EC | CDPdiacylglycerol (E coli)             |
| cdpdag_SA | CDPdiacylglycerol (Saureus)            |
| cdpea     | CDPethanolamine                        |
| cdpglyc   | CDPglycerol                            |
| chol      | Choline                                |
| chor      | Chorismate                             |
| cit       | Citrate                                |
| citr-L    | L-Citrulline                           |
| ckdo      | CMP-3-deoxy-D-manno-octulosonate       |
| clpn_EC   | Cardiolipin (Ecoli)                    |
| clpn_SA   | Cardiolipin (Saureus)                  |
| cmp       | CMP                                    |
| co2       | CO2                                    |
| coa       | Coenzyme A                             |
| cobalt2   | Co2+                                   |
| cpppg1    | Coproporphyrinogen I                   |
| cpppg3    | Coproporphyrinogen III                 |
| crn       | L-Carnitine                            |
| csn       | Cytosine                               |
| ctp       | CTP                                    |
| cu2       | Cu2+                                   |
| cys-L     | L-Cysteine                             |
| cyst-L    | L-Cystathionine                        |
| cystrna   | L-Cysteiny-tRNA(Cys)                   |
| cytd      | Cytidine                               |
| dad-2     | Deoxyadenosine                         |
| dadp      | dADP                                   |
| damp      | dAMP                                   |
| dann      | 7,8-Diaminononanoate                   |
| datp      | dATP                                   |
| db4p      | 3,4-dihydroxy-2-butanone 4-phosphate   |
| dc2coa    | trans-Dec-2-enoyl-CoA                  |
| dcacoa    | Decanoyl-CoA (n-C10:0CoA)              |
| dcamp     | N6-(1,2-Dicarboxyethyl)-AMP            |
| dcdp      | dCDP                                   |
| dcmp      | dCMP                                   |
| dctp      | dCTP                                   |
| dd2coa    | trans-Dodec-2-enoyl-CoA                |
| ddcaACP   | Dodecanoyl-ACP (n-C12:0ACP)            |
| ddcacoa   | Dodecanoyl-CoA (n-C12:0CoA)            |
| decdp     | all-trans-Decaprenyl diphosphate       |
| dgal6p    | D-Galactose 6-phosphate                |
| dgdcg_SA  | Diglucoosyl-diacylglycerol (SA)        |
| dgdcg_SA2 | Diglucoosyl-diacylglycerol (SA) 2      |

|        |                                                                             |
|--------|-----------------------------------------------------------------------------|
| dgdp   | dGDP                                                                        |
| dgmp   | dGMP                                                                        |
| dgtp   | dGTP                                                                        |
| dha    | Dihydroxyacetone                                                            |
| dhap   | Dihydroxyacetone phosphate                                                  |
| dhf    | 7,8-Dihydrofolate                                                           |
| dhlam  | Dihydrolipoamide                                                            |
| dhlpro | Dihydrolipolprotein                                                         |
| dhna   | 1,4-Dihydroxy-2-naphthoate                                                  |
| dhnpt  | 2-Amino-4-hydroxy-6-(D-erythro-1,2,3-trihydroxypropyl)-7,8-dihydropteridine |
| dhor-S | (S)-Dihydroorotate                                                          |
| dhpmp  | Dihydroneopterin monophosphate                                              |
| dhpt   | Dihydropteroate                                                             |
| dkmpp  | 2,3-diketo-5-methylthio-1-phosphopentane                                    |
| dmiz   | 6,7-Dimethyl-8-(1-D-ribityl)lumazine                                        |
| dmpp   | Dimethylallyl diphosphate                                                   |
| dnad   | Deamino-NAD <sup>+</sup>                                                    |
| dpcoa  | Dephospho-CoA                                                               |
| drib   | Deoxyribose                                                                 |
| dscl   | dihydrosirohydrochlorin                                                     |
| dtbt   | Dethiobiotin                                                                |
| dt dp  | dTDP                                                                        |
| dt mp  | dTMP                                                                        |
| dt tp  | dTTP                                                                        |
| dudp   | dUDP                                                                        |
| dump   | dUMP                                                                        |
| duri   | Deoxyuridine                                                                |
| dutp   | dUTP                                                                        |
| e4p    | D-Erythrose 4-phosphate                                                     |
| eig3p  | D-erythro-1-(Imidazol-4-yl)glycerol 3-phosphate                             |
| etha   | Ethanolamine                                                                |
| etoh   | Ethanol                                                                     |
| f1p    | D-Fructose 1-phosphate                                                      |
| f6p    | D-Fructose 6-phosphate                                                      |
| fa1    | Fatty acid (Iso-C14:0)                                                      |
| fa10   | Fatty acid (Anteiso-C17:1)                                                  |
| fa11   | Fatty acid (Iso-C17:0)                                                      |
| fa12   | Fatty acid (Anteiso-C17:0)                                                  |
| fa19a  | Fatty Acid (Anteiso-C19:0)                                                  |
| fa20n  | Fatty Acid (C20:0)                                                          |
| fa3    | Fatty acid (Iso-C15:0)                                                      |
| fa4    | Fatty acid (Anteiso-C15:0)                                                  |
| fa5    | Fatty acid (Iso-C16:1)                                                      |
| fa6    | Fatty acid (iso-C16:0)                                                      |
| fa9    | Fatty acid (Iso-C17:1)                                                      |
| fad    | FAD                                                                         |
| fadh2  | FADH <sub>2</sub>                                                           |
| fald   | Formaldehyde                                                                |
| fdp    | D-Fructose 1,6-bisphosphate                                                 |
| fdxox  | Oxidized ferredoxin                                                         |
| fdxrd  | Reduced ferredoxin                                                          |
| fe2    | Fe <sup>2+</sup>                                                            |
| fgam   | N2-Formyl-N1-(5-phospho-D-ribosyl)glycinamide                               |
| fmn    | FMN                                                                         |
| fmnh2  | Reduced FMN                                                                 |
| for    | Formate                                                                     |
| forglu | N-Formimidoyl-L-glutamate                                                   |
| fpram  | 2-(Formamido)-N1-(5-phospho-D-ribosyl)acetamide                             |
| fprica | 5-Formamido-1-(5-phospho-D-ribosyl)imidazole-4-carboxamide                  |
| frdp   | Farnesyl diphosphate                                                        |
| frmd   | Formamide                                                                   |
| fru    | D-Fructose                                                                  |
| fum    | Fumarate                                                                    |
| g1p    | D-Glucose 1-phosphate                                                       |
| g3p    | Glyceraldehyde 3-phosphate                                                  |
| g3pc   | sn-Glycero-3-phosphocholine                                                 |
| g3pe   | sn-Glycero-3-phosphoethanolamine                                            |
| g3pg   | Glycerophosphoglycerol                                                      |
| g3pi   | sn-Glycero-3-phospho-1-inositol                                             |
| g3ps   | Glycerophosphoserine                                                        |
| g6p    | D-Glucose 6-phosphate                                                       |
| galt1p | Galactitol 1-phosphate                                                      |
| gam1p  | D-Glucosamine 1-phosphate                                                   |
| gam6p  | D-Glucosamine 6-phosphate                                                   |
| gar    | N1-(5-Phospho-D-ribosyl)glycinamide                                         |
| gcald  | Glycolaldehyde                                                              |
| gdp    | GDP                                                                         |

|             |                                                              |
|-------------|--------------------------------------------------------------|
| gdptp       | Guanosine 3'-diphosphate 5'-triphosphate                     |
| glc-D       | D-Glucose                                                    |
| glcn        | D-Gluconate                                                  |
| glcp_SA     | Glucosyl Phosphoglycerol (SA)                                |
| gln-L       | L-Glutamine                                                  |
| glu-D       | D-Glutamate                                                  |
| glu-L       | L-Glutamate                                                  |
| glu1sa      | L-Glutamate 1-semialdehyde                                   |
| glu5sa      | L-Glutamate 5-semialdehyde                                   |
| glutrna     | L-Glutamyl-tRNA(Glu)                                         |
| glx         | Glyoxylate                                                   |
| gly         | Glycine                                                      |
| glyald      | D-Glyceraldehyde                                             |
| glyb        | Glycine betaine                                              |
| glyc        | Glycerol                                                     |
| glyc-R      | (R)-Glycerate                                                |
| glyc3p      | Glycerol 3-phosphate                                         |
| glyclt      | Glycolate                                                    |
| glycogen    | glycogen                                                     |
| glytrna     | Glycyl-tRNA(Gly)                                             |
| gmhep17bp   | D-Glycero-D-manno-heptose 1,7-bisphosphate                   |
| gmhep1p     | D-Glycero-D-manno-heptose 1-phosphate                        |
| gmhep7p     | D-Glycero-D-manno-heptose 7-phosphate                        |
| gmp         | GMP                                                          |
| grdp        | Geranyl diphosphate                                          |
| gtca1       | glycerol teichoic acid (n=25), unlinked, unsubstituted       |
| gtca2       | glycerol teichoic acid (n=25), unlinked, D-ala substituted   |
| gtca3       | glycerol teichoic acid (n=25), unlinked, glucose substituted |
| gthox       | Oxidized glutathione                                         |
| gthrd       | Reduced glutathione                                          |
| gtp         | GTP                                                          |
| gua         | Guanine                                                      |
| h           | H+                                                           |
| h2o         | H2O                                                          |
| h2o2        | Hydrogen peroxide                                            |
| h2s         | Hydrogen sulfide                                             |
| hco3        | Bicarbonate                                                  |
| hcys-L      | L-Homocysteine                                               |
| hdca        | Hexadecanoate (n-C16:0)                                      |
| hdcea       | hexadecenoate (n-C16:1)                                      |
| hdd2coa     | trans-Hexadec-2-enoyl-CoA                                    |
| hdeACP      | Hexadecenoyl-ACP (n-C16:1ACP)                                |
| hemeA_#1    | Heme A                                                       |
| hemeO       | Heme O                                                       |
| hepdp       | all-trans-Heptaprenyl diphosphate                            |
| hexdp       | all-trans-Hexaprenyl diphosphate                             |
| his-L       | L-Histidine                                                  |
| hisp        | L-Histidinol phosphate                                       |
| histd       | L-Histidinol                                                 |
| hmbil       | Hydroxymethylbilane                                          |
| hmgcoa      | Hydroxymethylglutaryl-CoA                                    |
| hom-L       | L-Homoserine                                                 |
| hpglu       | Tetrahydropteroyltri-L-glutamate                             |
| hpyr        | Hydroxypyruvate                                              |
| hx2coa      | trans-Hex-2-enoyl-CoA                                        |
| hxan        | Hypoxanthine                                                 |
| hxcoa       | Hexanoyl-CoA                                                 |
| ibcoa       | Isobutyryl-CoA                                               |
| ichor       | Isochorismate                                                |
| icit        | Isocitrate                                                   |
| id3acald    | Indole-3-acetaldehyde                                        |
| idp         | IDP                                                          |
| ile-L       | L-Isoleucine                                                 |
| iletrna     | L-Isoleucyl-tRNA(Ile)                                        |
| imacp       | 3-(Imidazol-4-yl)-2-oxopropyl phosphate                      |
| imp         | IMP                                                          |
| indpyr      | Indolepyruvate                                               |
| inost       | myo-Inositol                                                 |
| ipdp        | Isopentenyl diphosphate                                      |
| itp         | ITP                                                          |
| ivcoa       | Isovaleryl-CoA                                               |
| k           | K+                                                           |
| kdo         | 3-Deoxy-D-manno-2-octulosonate                               |
| kdo2lipid4  | KDO(2)-lipid IV(A)                                           |
| kdo2lipid4L | KDO(2)-lipid IV(A) with laurate                              |
| kdo8p       | 3-Deoxy-D-manno-octulosonate 8-phosphate                     |
| kdolipid4   | KDO-lipid IV(A)                                              |

|          |                                                                                                  |
|----------|--------------------------------------------------------------------------------------------------|
| lac-D    | D-Lactate                                                                                        |
| lac-L    | L-Lactate                                                                                        |
| leu-L    | L-Leucine                                                                                        |
| lipa     | KDO(2)-lipid (A)                                                                                 |
| lipidA   | 2,3,2'3'-Tetrakis(beta-hydroxymyristoyl)-D-glucosaminyl-1,6-beta-D-glucosamine 1,4'-bisphosphate |
| lipidAds | Lipid A Disaccharide                                                                             |
| lipidX   | 2,3-Bis(3-hydroxytetradecanoyl)-beta-D-glucosaminyl 1-phosphate                                  |
| lpam     | Lipoamide                                                                                        |
| lpro     | Lipoylprotein                                                                                    |
| lps_EC   | lipopolysaccharide (Ecoli)                                                                       |
| lys-L    | L-Lysine                                                                                         |
| lystrna  | L-Lysine-tRNA (Lys)                                                                              |
| mal-L    | L-Malate                                                                                         |
| malACP   | Malonyl-[acyl-carrier protein]                                                                   |
| malcoa   | Malonyl-CoA                                                                                      |
| male     | Maleate                                                                                          |
| malm     | Maleamate                                                                                        |
| malt     | Maltose                                                                                          |
| man1p    | D-Mannose 1-phosphate                                                                            |
| man6p    | D-Mannose 6-phosphate                                                                            |
| melib    | Melibiose                                                                                        |
| meoh     | Methanol                                                                                         |
| met-L    | L-Methionine                                                                                     |
| methf    | 5,10-Methenyltetrahydrofolate                                                                    |
| mettrna  | L-Methionyl-tRNA (Met)                                                                           |
| mev-R    | (R)-Mevalonate                                                                                   |
| mg2      | Mg                                                                                               |
| mhpglu   | 5-Methyltetrahydropteroyltri-L-glutamate                                                         |
| mi1p-D   | 1D-myo-Inositol 1-phosphate                                                                      |
| mlthf    | 5,10-Methylenetetrahydrofolate                                                                   |
| mn2      | Mn2+                                                                                             |
| mn1p     | D-Mannitol 1-phosphate                                                                           |
| mobd     | Molybdate                                                                                        |
| mq18     | Menaquinol 8                                                                                     |
| mqn8     | Menaquinone 8                                                                                    |
| myrsACP  | Myristoyl-ACP (n-C14:0ACP)                                                                       |
| n6all26d | N6-Acetyl-LL-2,6-diaminoheptanedioate                                                            |
| na1      | Sodium                                                                                           |
| nac      | Nicotinate                                                                                       |
| nad      | Nicotinamide adenine dinucleotide                                                                |
| nadh     | Nicotinamide adenine dinucleotide - reduced                                                      |
| nadp     | Nicotinamide adenine dinucleotide phosphate                                                      |
| nadph    | Nicotinamide adenine dinucleotide phosphate - reduced                                            |
| nal2a6o  | N-Acetyl-L-2-amino-6-oxopimelate                                                                 |
| ncam     | Nicotinamide                                                                                     |
| nh4      | Ammonium                                                                                         |
| nh4oh    | Ammonium hydroxide                                                                               |
| ni2      | Ni2+                                                                                             |
| nicmt    | Nicotinate D-ribonucleotide                                                                      |
| no2      | Nitrite                                                                                          |
| no3      | Nitrate                                                                                          |
| nop      | D-Nopaline                                                                                       |
| o2       | O2                                                                                               |
| o2-      | Superoxide anion                                                                                 |
| oaa      | Oxaloacetate                                                                                     |
| oc2coa   | trans-Oct-2-enoyl-CoA                                                                            |
| occoa    | Octanoyl-CoA (n-C8:0CoA)                                                                         |
| ocdca    | octadecanoate (n-C18:0)                                                                          |
| ocdcea   | octadecenoate (n-C18:1)                                                                          |
| octdp    | all-trans-Octaprenyl diphosphate                                                                 |
| octeACP  | Octadecenoyl-ACP (n-C18:1ACP)                                                                    |
| octp     | Octopine                                                                                         |
| orn      | Ornithine                                                                                        |
| orot     | Orotate                                                                                          |
| orot5p   | Orotidine 5'-phosphate                                                                           |
| pa_EC    | phosphatidate (E.coli)                                                                           |
| pa_SA    | phosphatidate (Saureus)                                                                          |
| pala_SA  | Phosphatidylalanine_SA                                                                           |
| pala_SA2 | Phosphatidylalanine_SA2                                                                          |
| palmACP  | Palmitoyl-ACP (n-C16:0ACP)                                                                       |
| pan4p    | Pantetheine 4'-phosphate                                                                         |
| pant-R   | (R)-Pantoate                                                                                     |
| pap      | Adenosine 3',5'-bisphosphate                                                                     |
| paps     | 3'-Phosphoadenylyl sulfate                                                                       |
| pe_EC    | Phosphatidylethanolamine (ecoli)                                                                 |
| pe_SA    | Phosphatidylethanolamine (Saureus)                                                               |
| pep      | Phosphoenolpyruvate                                                                              |

|            |                                                                                                      |
|------------|------------------------------------------------------------------------------------------------------|
| peptido_EC | Peptidoglycan subunit of Escherichia coli                                                            |
| pg_EC      | Phosphatidylglycerol (Ecoli)                                                                         |
| pg_HP      | Phosphatidylglycerol Hp specific                                                                     |
| pg_SA      | Phosphatidylglycerol (Saureus)                                                                       |
| pgly_SA    | Phosphatidylglycine_SA                                                                               |
| pgly_SA2   | Phosphatidylglycine_SA2                                                                              |
| pgp_EC     | Phosphatidylglycerophosphate (Ecoli)                                                                 |
| pgp_SA     | Phosphatidylglycerophosphate (Saureus)                                                               |
| phe-L      | L-Phenylalanine                                                                                      |
| pheme      | Protoheme                                                                                            |
| phom       | O-Phospho-L-homoserine                                                                               |
| phpyr      | Phenylpyruvate                                                                                       |
| pi         | Phosphate                                                                                            |
| pime       | Pimelate                                                                                             |
| pleu_SA    | Phosphatidylleucine_SA                                                                               |
| pleu_SA2   | Phosphatidylleucine_SA2                                                                              |
| plys_SA    | Phosphatidyllysine_SA                                                                                |
| plys_SA2   | Phosphatidyllysine_SA2                                                                               |
| pmcoa      | Pimeloyl-CoA                                                                                         |
| pmtcoa     | Palmitoyl-CoA (n-C16:0CoA)                                                                           |
| pnto-R     | (R)-Pantothenate                                                                                     |
| ppbng      | Porphobilinogen                                                                                      |
| pphn       | Prephenate                                                                                           |
| ppi        | Diphosphate                                                                                          |
| ppp9       | Protoporphyrin                                                                                       |
| pppg9      | Protoporphyrinogen IX                                                                                |
| pppi       | Inorganic triphosphate                                                                               |
| pram       | 5-Phospho-beta-D-ribosylamino                                                                        |
| pran       | N-(5-Phospho-D-ribosyl)anthranilate                                                                  |
| prbamp     | 1-(5-Phosphoribosyl)-AMP                                                                             |
| prbatp     | 1-(5-Phosphoribosyl)-ATP                                                                             |
| prfp       | 1-(5-Phosphoribosyl)-5-[(5-phosphoribosylamino)methylideneamino]imidazole-4-carboxamide              |
| prlp       | 5-[(5-phospho-1-deoxyribulos-1-ylamino)methylideneamino]-1-(5-phosphoribosyl)imidazole-4-carboxamide |
| pro-L      | L-Proline                                                                                            |
| prpp       | 5-Phospho-alpha-D-ribose 1-diphosphate                                                               |
| ps_EC      | phosphatidylserine (Ecoli)                                                                           |
| ps_SA      | phosphatidylserine (Saureus)                                                                         |
| psd5p      | Pseudouridine 5'-phosphate                                                                           |
| pser-L     | O-Phospho-L-serine                                                                                   |
| ptrc       | Putrescine                                                                                           |
| pyr        | Pyruvate                                                                                             |
| q8         | Ubiquinone-8                                                                                         |
| q8h2       | Ubiquinol-8                                                                                          |
| r1p        | alpha-D-Ribose 1-phosphate                                                                           |
| r5p        | alpha-D-Ribose 5-phosphate                                                                           |
| raffin     | Raffinose                                                                                            |
| rbflvrd    | Reduced riboflavin                                                                                   |
| rbl-L      | L-Ribulose                                                                                           |
| rhcys      | S-Ribosyl-L-homocysteine                                                                             |
| rib-D      | D-Ribose                                                                                             |
| ribflv     | Riboflavin                                                                                           |
| ru5p-D     | D-Ribulose 5-phosphate                                                                               |
| ru5p-L     | L-Ribulose 5-phosphate                                                                               |
| s          | Sulfur                                                                                               |
| s7p        | Sedoheptulose 7-phosphate                                                                            |
| salc6p     | Salicin 6-phosphate                                                                                  |
| sbt-D      | D-Sorbitol                                                                                           |
| sbzcoa     | O-Succinylbenzoyl-CoA                                                                                |
| scl        | sirohchlorin                                                                                         |
| sdhlam     | S-Succinylidihydroipoamide                                                                           |
| ser-L      | L-Serine                                                                                             |
| sertma     | L-Seryl-tRNA(Ser)                                                                                    |
| sheme      | Siroheme                                                                                             |
| skm        | Shikimate                                                                                            |
| skm5p      | Shikimate 5-phosphate                                                                                |
| sl26da     | N-Succinyl-LL-2,6-diaminoheptanedioate                                                               |
| sl2a6o     | N-Succinyl-2-L-amino-6-oxoheptanedioate                                                              |
| so3        | Sulfite                                                                                              |
| so4        | Sulfate                                                                                              |
| spmd       | Spermidine                                                                                           |
| sql        | Squalene                                                                                             |
| ssaltpp    | Succinate semialdehyde-thiamin diphosphate anion                                                     |
| suc6p      | Sucrose 6-phosphate                                                                                  |
| sucbz      | o-Succinylbenzoate                                                                                   |
| succ       | Succinate                                                                                            |
| succoa     | Succinyl-CoA                                                                                         |
| suchms     | O-Succinyl-L-homoserine                                                                              |

|          |                                                                                                                |
|----------|----------------------------------------------------------------------------------------------------------------|
| sucr     | Sucrose                                                                                                        |
| sucsal   | Succinic semialdehyde                                                                                          |
| tag6p-D  | D-Tagatose 6-phosphate                                                                                         |
| tagdp-D  | D-Tagatose 1,6-biphosphate                                                                                     |
| tcam     | minor teichoic acid (acetylgalactosamine glucose phosphate, n=30)                                              |
| td2coa   | trans-Tetradec-2-enoyl-CoA                                                                                     |
| tdcoa    | Tetradecanoyl-CoA (n-C14:0CoA)                                                                                 |
| tdeACP   | Tetradecenoyl-ACP (n-C14:1ACP)                                                                                 |
| thdp     | 2,3,4,5-Tetrahydrodipicolinate                                                                                 |
| thf      | 5,6,7,8-Tetrahydrofolate                                                                                       |
| thfglu   | Tetrahydrofolyl-[Glu](2)                                                                                       |
| thm      | Thiamin                                                                                                        |
| thmmp    | Thiamin monophosphate                                                                                          |
| thmpp    | Thiamine diphosphate                                                                                           |
| thr-L    | L-Threonine                                                                                                    |
| thtrna   | L-Threonyl-tRNA(Thr)                                                                                           |
| thymd    | Thymidine                                                                                                      |
| trdox    | Oxidized thioredoxin                                                                                           |
| trdrd    | Reduced thioredoxin                                                                                            |
| tre6p    | alpha,alpha'-Trehalose 6-phosphate                                                                             |
| trnaala  | tRNA(Ala)                                                                                                      |
| trnaarg  | tRNA(Arg)                                                                                                      |
| trnaasn  | tRNA(Asn)                                                                                                      |
| trnaasp  | tRNA(Asp)                                                                                                      |
| trnacys  | tRNA(Cys)                                                                                                      |
| trnaglu  | tRNA (Glu)                                                                                                     |
| trnagly  | tRNA(Gly)                                                                                                      |
| trnaile  | tRNA(Ile)                                                                                                      |
| trnalys  | tRNA(Lys)                                                                                                      |
| trnamet  | tRNA(Met)                                                                                                      |
| trnaser  | tRNA(Ser)                                                                                                      |
| trnathr  | tRNA(Thr)                                                                                                      |
| trp-L    | L-Tryptophan                                                                                                   |
| ttzca    | tetradecanoate (n-C14:0)                                                                                       |
| tyr-L    | L-Tyrosine                                                                                                     |
| u23ga    | UDP-2,3-bis(3-hydroxytetradecanoyl)glucosamine                                                                 |
| u3aga    | UDP-3-O-(3-hydroxytetradecanoyl)-N-acetylglucosamine                                                           |
| u3hga    | UDP-3-O-(3-hydroxytetradecanoyl)-D-glucosamine                                                                 |
| uaagmda  | Undecaprenyl-diphospho-N-acetylmuramoyl-(N-acetylglucosamine)-L-ala-D-glu-meso-2,6-diaminopimeloyl-D-ala-D-ala |
| uaccg    | UDP-N-acetyl-3-O-(1-carboxyvinyl)-D-glucosamine                                                                |
| uacgam   | UDP-N-acetyl-D-glucosamine                                                                                     |
| uacmam   | UDP-N-acetyl-D-mannosamine                                                                                     |
| uagmda   | Undecaprenyl-diphospho-N-acetylmuramoyl-L-alanyl-D-glutamyl-meso-2,6-diaminopimeloyl-D-alanyl-D-alanine        |
| uama     | UDP-N-acetylmuramoyl-L-alanine                                                                                 |
| uamag    | UDP-N-acetylmuramoyl-L-alanyl-D-glutamate                                                                      |
| uamr     | UDP-N-acetylmuramate                                                                                           |
| udcp     | Undecaprenol                                                                                                   |
| udcpdp   | Undecaprenyl diphosphate                                                                                       |
| udcpp    | Undecaprenyl phosphate                                                                                         |
| udp      | UDP                                                                                                            |
| udpacgal | UDP-N-acetyl-D-galactosamine                                                                                   |
| udpg     | UDPglucose                                                                                                     |
| udpgal   | UDPgalactose                                                                                                   |
| ugmd     | UDP-N-acetylmuramoyl-L-alanyl-D-gamma-glutamyl-meso-2,6-diaminopimelate                                        |
| ugmda    | UDP-N-acetylmuramoyl-L-alanyl-D-glutamyl-meso-2,6-diaminopimeloyl-D-alanyl-D-alanine                           |
| ump      | UMP                                                                                                            |
| uppg1    | Uroporphyrinogen I                                                                                             |
| uppg3    | Uroporphyrinogen III                                                                                           |
| ura      | Uracil                                                                                                         |
| urcan    | Urocanate                                                                                                      |
| urea     | Urea                                                                                                           |
| uri      | Uridine                                                                                                        |
| utp      | UTP                                                                                                            |
| val-L    | L-Valine                                                                                                       |
| xan      | Xanthine                                                                                                       |
| xmp      | Xanthosine 5'-phosphate                                                                                        |
| xu5p-D   | D-Xylulose 5-phosphate                                                                                         |
| zn2      | Zinc                                                                                                           |
