# Supplementary material for: Genome-scale reconstruction of the metabolic network in Staphylococcus aureus N315: an initial draft to the two-dimensional annotation
Source: PubMed Central journal article supplement (PMC1079855; doi:10.1186/1471-2180-5-8), 2005-03-07
Supplement: 1471-2180-5-8-S3.pdf [file 1471-2180-5-8-S3.pdf]

| <b>Reaction</b> | <b>Reason for Dead End</b>                                                            |
|-----------------|---------------------------------------------------------------------------------------|
| 3M2OBLOXRD      | no further conversion for product                                                     |
| 3M2OPLOXRD      | no further conversion for product                                                     |
| 4M2OPLOXRD      | no further conversion for product                                                     |
| 6PHBG           | no further conversion for product                                                     |
| ABTAr           | no gene for glutamate decarboxylase to produce substrate                              |
| ACLDC           | no further conversion for product                                                     |
| ADCYRS          | product of pathway not included in model                                              |
| ADPRDP          | further DNA metabolism not included; accounted for differently in biomass             |
| AGMHE           | no further conversion for product                                                     |
| AHCYSNS         | no further conversion for byproduct (rhcys)                                           |
| ALATRS          | tRNA not extended beyond synthesis                                                    |
| ALCD1           | both product and reactant not included in model further                               |
| AMAA            | substrate and product not further included in model--biotin not required in model now |
| AMAOTr          | no need for biotin in model                                                           |
| ARGTRS          | tRNA not extended beyond synthesis                                                    |
| ASNTRS          | tRNA not extended beyond synthesis                                                    |
| ASPTRS          | tRNA not extended beyond synthesis                                                    |
| BACCL           | no need for biotin in model                                                           |
| BTS3R           | no need for biotin in model                                                           |
| CDPMEK          | present in annotation, but product unused                                             |
| CHCOAL          | biotin pathway left incomplete                                                        |
| CIT-Mgt         | transporter included based on kegg annotation and inclusion in b. subtilis            |
| Coabc           | annotation includes this function, but no clear use for cobalt inside cell            |
| CRNabc          | annotation includes this function, but no clear use for crn inside cell               |
| Cut1            | included in annotation but no source of copper inside                                 |
| CYSTRS          | tRNA not extended beyond synthesis                                                    |
| DHNAOT          | no way to produce substrate in genome annotation--quinones not considered in biomass  |
| DRBK            | deoxyribose not required in biomass                                                   |
| FGLU            | no reaction to use formamide located in annotation                                    |
| FLVR            | no reactions using reduced riboflavin located in annotation                           |
| FLVR(NAD)       | no reactions using reduced riboflavin located in annotation                           |
| G3PD7           | quinone unused                                                                        |
| G6PDH2R         | due to gap in pentose phosphate pathway                                               |
| GALTPTS         | in annotation but no use inside cell currently                                        |
| GCALDD          | no use for product in annotation                                                      |
| GLYALDt         | potential transporter in annotation, but no use inside cell                           |
| GLYAT           | no further consumption (or generation) of product                                     |
| GLYD            | no use for product                                                                    |
| GLYTRS          | tRNA not extended beyond synthesis                                                    |
| GPDDA1          | in annotation, but no way to produce substrates                                       |
| GPDDA2          | in annotation, but no way to produce substrates                                       |
| GPDDA3          | in annotation, but no way to produce substrates                                       |
| GPDDA4          | in annotation, but no way to produce substrates                                       |
| GPDDA5          | in annotation, but no way to produce substrates                                       |
| GTHP            | in annotation, but no clear use for compounds                                         |
| GTPDPK          | no clear use for product                                                              |
| HEMEAS          | hemeA not included in biomass at this point                                           |
| HETZK           | in annotation, but disconnected from rest of network                                  |
| HEXTT           | quinone unused                                                                        |
| HSERTA          | product unused elsewhere                                                              |
| HXPRT           | substrate not produced in model                                                       |
| ILETRS          | tRNA not extended beyond synthesis                                                    |
| INDPYRD         | product and reactant not further used in model                                        |
| KAS10           | minor fatty acid componts left out of biomass--so reactions appear to be unused       |
| KAS14           | minor fatty acid componts left out of biomass--so reactions appear to be unused       |
| KAS15           | minor fatty acid componts left out of biomass--so reactions appear to be unused       |

|         |                                                                                 |
|---------|---------------------------------------------------------------------------------|
| KAS16   | minor fatty acid componts left out of biomass--so reactions appear to be unused |
| KAS17   | minor fatty acid componts left out of biomass--so reactions appear to be unused |
| KAS5    | minor fatty acid componts left out of biomass--so reactions appear to be unused |
| KAS7    | minor fatty acid componts left out of biomass--so reactions appear to be unused |
| KAS9    | minor fatty acid componts left out of biomass--so reactions appear to be unused |
| LYSDC   | product not further used in model                                               |
| LYSTRS  | tRNA not extended beyond synthesis                                              |
| MALTAT  | product unused elsewhere                                                        |
| MEPCT   | present in annotation, but substrate not created                                |
| METTRS  | tRNA not extended beyond synthesis                                              |
| MG2abc  | common media includes mg2, so transporter added                                 |
| MHPGLUT | byproducts unused elsewhere                                                     |
| MI1PP   | product and reactant not further used in model                                  |
| MNabc   | common media includes MN, so transporter added                                  |
| MNt2    | common media includes MN, so transporter added                                  |
| MOBDabc | transporter included in annotation but compound not used in model               |
| NADH8   | particular quinone unused in model due to not being regenerated                 |
| NADH9   | particular quinone unused in model due to not being regenerated                 |
| NALN6   | included in annotation, but disconnected from rest of model                     |
| NBAH    | bz not used in model                                                            |
| NDPK4   | dttp not required in biomass                                                    |
| NIabc   | nickel transporter annotated but no function for nickel in model                |
| NOPD    | nop not further used                                                            |
| OCTD    | octp not further used                                                           |
| OOR2r   | ferredoxins not regenerated in this model                                       |
| ORNTA   | byproduct not used elsewhere                                                    |
| PGLYCP  | product and reactant not further used in model                                  |
| PMANM   | product not further used in model                                               |
| PMPK    | substrate not produced in model                                                 |
| PTHPS   | product not further used in model                                               |
| PUNP2   | product not further used in model                                               |
| PYRZAM  | product and reactant not further used in model                                  |
| RAFH    | product and reactant not further used in model                                  |
| RBK_L1  | product not further used in model                                               |
| S3AdT   | functionality not yet extended--not traditional metabolism                      |
| SBTD_Dr | product not further used in model                                               |
| SERTRS  | tRNA not extended beyond synthesis                                              |
| SHCHCS2 | quinone unused                                                                  |
| SPODM   | superoxide not generated in model                                               |
| SPT3ADT | functionality not yet extended--not traditional metabolism                      |
| SQLS    | sql not used in model                                                           |
| THFGLUS | product not further used in model                                               |
| THRTRS  | tRNA not extended beyond synthesis                                              |
| TMPPP   | product unused elsewhere                                                        |
| UAGPT3  | product unused elsewhere                                                        |
| UDCPKr  | substrate not produced in model                                                 |
| UDPDPs  | substrate not produced in model                                                 |
| UDPG4E  | product not further used in model                                               |
| UPPDC2  | product not further used in model                                               |
| URFGTT  | product and reactant not further used in model                                  |
| YUMPS   | product not further used in model                                               |
| ZNABC   | transporter in annotation, but no function for zn in model                      |
