# Supplementary material for: Genome-scale reconstruction of the metabolic network in Staphylococcus aureus N315: an initial draft to the two-dimensional annotation
Source: PubMed Central journal article supplement (PMC1079855; doi:10.1186/1471-2180-5-8), 2005-03-07
Supplement: 1471-2180-5-8-S4.pdf [file 1471-2180-5-8-S4.pdf]

| Reaction Abbreviation | Gene Association                               | Isozymes? |
|-----------------------|------------------------------------------------|-----------|
| ACCOAC                | SA1357, SA1358, SA1434, SA1435, SA1522, SA1523 | no        |
| ACGK                  | SA0176                                         |           |
| ACHBS                 | SA1859, SA1860, SA2008                         | partial   |
| ACLS                  | SA1859, SA1860, SA2008                         | partial   |
| ACOTA                 | SA0179                                         |           |
| ADCL                  | SA0670                                         |           |
| ADCS                  | SA0669                                         |           |
| ADK1                  | SA2027                                         |           |
| ADKd                  | SA2027                                         |           |
| ADMDCr                |                                                |           |
| ADPT                  | SA1461                                         |           |
| ADSK                  | SA2456                                         |           |
| ADSL1                 | SA1724                                         |           |
| ADSL2r                | SA1724                                         |           |
| ADSS                  | SA0016                                         |           |
| AGPR                  | SA0178                                         |           |
| AICART                | SA0925                                         |           |
| AIRC2                 | SA0917                                         |           |
| AIRC3                 | SA0916                                         |           |
| AKGDa                 | SA1245                                         |           |
| AKGDb                 | SA1244                                         |           |
| ALAR                  | SA1231, SA1874                                 | yes       |
| ALATA_D               | SA1571                                         |           |
| ANPRT                 | SA1201                                         |           |
| ANS                   | SA0668, SA1199, SA1200                         | partial   |
| APRAUR                | SA1586, SA1588                                 | no        |
| ASAD                  | SA1226                                         |           |
| ASNS1                 | SA0922                                         |           |
| ASPki                 | SA1163, SA1225                                 | yes       |
| ASPTA                 | SA1749                                         |           |
| ATPPRT                | SA2471                                         |           |
| BPNT                  |                                                |           |
| CHORM                 | SA1558                                         |           |
| CHORS                 | SA1299                                         |           |
| CLPNS_SA              | SA1155, SA1891                                 | yes       |
| CO2t                  |                                                |           |
| CPPPGO                | SA1412                                         |           |
| CSNi2                 |                                                |           |
| CYSS                  | SA0418, SA0471                                 | yes       |
| CYSTL                 | SA0346                                         |           |
| CYTBD                 | SA0910, SA0911, SA0912, SA0913, SA0937, SA0938 | no        |
| CYTD                  | SA1397                                         |           |
| CYTK1                 | SA1309                                         |           |
| DAPDC                 | SA0119, SA1232                                 | yes       |
| DAPE                  |                                                |           |
| DASYN_SA              | SA1104                                         |           |
| DB4PS                 | SA1587                                         |           |
| DDPA                  | SA1558                                         |           |
| DGK1                  | SA1052                                         |           |

|          |                |     |
|----------|----------------|-----|
| DHAD1    | SA1858         |     |
| DHAD2    | SA1858         |     |
| DHDPRy   | SA1228         |     |
| DHDPS    | SA1227         |     |
| DHFR     | SA1259         |     |
| DHFS     | SA1487         |     |
| DHNPA2   | SA0473         |     |
| DHPPDA   | SA1589         |     |
| DHPS2    | SA0472         |     |
| DHQD     | SA0756         |     |
| DHQS     | SA1298         |     |
| DMATT    | SA1352         |     |
| DPMVD    | SA0548         |     |
| FCLT     | SA1651         |     |
| FE2abc   | SA2337, SA2369 | yes |
| FMNAT    | SA1115         |     |
| FUM      | SA1669         |     |
| G1PACT   | SA0457         |     |
| G1SATi   | SA1491, SA1681 | yes |
| G3PCT    | SA0597         |     |
| G3PD2    | SA1306         |     |
| GALUi    | SA2288         |     |
| GARFT    | SA0924         |     |
| GCALDD   | SA2406         |     |
| GF6PTA   | SA1959         |     |
| GK1      | SA1052         |     |
| GLNS     | SA1150         |     |
| GLUPRT   | SA0922         |     |
| GLUR     | SA0997         |     |
| GLUTRR   | SA1496         |     |
| GLUTRS   | SA0486         |     |
| GMPS2    | SA0376         |     |
| GRTT     | SA1352         |     |
| GTPCI    | SA0683         |     |
| GTPCII   | SA1587         |     |
| HCO3E    | SA2287         |     |
| HEMEOS   | SA0965         |     |
| HISTD    | SA2470         |     |
| HISTP    |                |     |
| HMBS     | SA1494         |     |
| HMGCOARi | SA2333         |     |
| HMGCOASi | SA2334         |     |
| HPPK2    | SA0474         |     |
| HSDy     | SA1164         |     |
| HSK      | SA1166         |     |
| HSTPT    | SA0679, SA2469 | yes |
| IG3PS    | SA2465, SA2467 | no  |
| IGPDH    | SA2468         |     |
| IGPS     | SA1202         |     |
| ILETA    | SA0512         |     |

|                    |                        |     |
|--------------------|------------------------|-----|
| IMPC               | SA0925                 |     |
| IMPD               | SA0375                 |     |
| IPDDI              | SA2136                 |     |
| IPMD               | SA1863                 |     |
| IPPMIa             | SA1864, SA1865         | no  |
| IPPMIb             | SA1864, SA1865         | no  |
| IPPS               | SA0837, SA1862         | yes |
| KARA1i             | SA1861                 |     |
| KARA2i             | SA1861                 |     |
| KAS1               | SA0842, SA0843         | no  |
| KAS11              | SA0842, SA0843         | no  |
| KAS12              | SA0842, SA0843         | no  |
| KAS13              | SA0842, SA0843         | no  |
| KAS19SA            | SA0842, SA0843         | no  |
| KAS2               | SA0842, SA0843         | no  |
| KAS20SA            | SA0842, SA0843         | no  |
| KAS3               | SA0842, SA0843         | no  |
| KAS4               | SA0842, SA0843         | no  |
| KAS6               | SA0842, SA0843         | no  |
| KAS8               | SA0842, SA0843         | no  |
| LEUTA              | SA0512                 |     |
| MDRPD              |                        |     |
| METAT              | SA1608                 |     |
| METS               | SA0344, SA0345         | no  |
| MTAN               | SA1427                 |     |
| MTHFR2             |                        |     |
| MTRI               |                        |     |
| MTRK               |                        |     |
| NACUP              |                        |     |
| NADK               | SA0865                 |     |
| NADS1              | SA1728                 |     |
| NAPRT <sub>r</sub> | SA1729                 |     |
| NDPK1              | SA1301                 |     |
| NDPK2              | SA1301                 |     |
| NDPK3              | SA1301                 |     |
| NDPK8              | SA1301                 |     |
| NNAT <sub>r</sub>  | SA1422                 |     |
| O2t5i              |                        |     |
| OCBT               | SA1012, SA2427         | yes |
| OIVD1              | SA1346, SA1347, SA1348 | no  |
| OIVD2              | SA1346, SA1347, SA1348 | no  |
| OIVD3              | SA1346, SA1347, SA1348 | no  |
| OMCDC              | SA1863                 |     |
| ORNTAC             | SA0177                 |     |
| P5CD               | SA2341                 |     |
| PALASA_SA2         |                        |     |
| PAPA_SA            |                        |     |
| PAPSR              |                        |     |
| PASYN_SA           |                        |     |
| PDH <sub>cr</sub>  | SA0946, SA1349         | yes |

|            |                        |     |
|------------|------------------------|-----|
| PGAMT      | SA1965                 |     |
| PGCD       | SA1545                 |     |
| PGLYSA_SA2 |                        |     |
| PGMT       | SA1965                 |     |
| PGPP_SA    | SA1250                 |     |
| PGSA_SA    | SA1126                 |     |
| PHETA1     | SA0679, SA2469         | yes |
| PLEUSA_SA2 |                        |     |
| PLYSSA_SA2 |                        |     |
| PMDPHT     | SA1586, SA1588         | no  |
| PMEVK      | SA0549                 |     |
| PPA        | SA1735                 |     |
| PPBNGS     | SA1492                 |     |
| PPM        | SA0134                 |     |
| PPND       | SA1197                 |     |
| PPNDH      | SA1731                 |     |
| PPPGO      | SA1650                 |     |
| PRAGS      | SA0926                 |     |
| PRAI       | SA1203                 |     |
| PRAIS      | SA0923                 |     |
| PRAMPC     | SA2464                 |     |
| PRASCS     | SA0918                 |     |
| PRATPP     | SA2464                 |     |
| PRFGS      | SA0919, SA0920, SA0921 | no  |
| PRMICi     | SA2466                 |     |
| PROD2      | SA1585                 |     |
| PRPPS      | SA0458                 |     |
| PSCVT      | SA1297                 |     |
| PSD_SA     |                        |     |
| PSERT      |                        |     |
| PSP_L      |                        |     |
| PSSA_SA    |                        |     |
| PYNP1      | SA1938                 |     |
| RBFK       | SA1115                 |     |
| RBFSa      | SA1588                 |     |
| RBFSb      | SA1586                 |     |
| RPE        | SA1065                 |     |
| RPI        | SA2127                 |     |
| SADT2      | SA0506                 |     |
| SDPDS      | SA1572, SA1814         | yes |
| SDPTA      | SA2347                 |     |
| SERAT      | SA0487                 |     |
| SHCHD2     | SA2412                 |     |
| SHCHF      | SA2412                 |     |
| SHK3Dr     | SA1424                 |     |
| SHKK       | SA1368                 |     |
| SHSL1      | SA0347                 |     |
| SHSL4r     | SA0419                 |     |
| SPMS       |                        |     |
| SUCD1      | SA0994, SA0995, SA0996 | no  |

|                   |                                                                                                                |         |
|-------------------|----------------------------------------------------------------------------------------------------------------|---------|
| SUCD4             | SA0994, SA0995, SA0996                                                                                         | no      |
| SUCOAS            | SA1088, SA1089                                                                                                 | no      |
| SULR              | SA2413                                                                                                         |         |
| SULabc            |                                                                                                                |         |
| TAGO              |                                                                                                                |         |
| TECA1S            | SA0243, SA0244, SA0522, SA0523, SA0592, SA0593, SA0594, SA0595, SA0596, SA0597                                 | partial |
| TECA2S            | SA0243, SA0244, SA0522, SA0523, SA0592, SA0593, SA0594, SA0595, SA0596, SA0597, SA0793, SA0794, SA0795, SA0796 | partial |
| TECA3S            | SA0243, SA0244, SA0522, SA0523, SA0592, SA0593, SA0594, SA0595, SA0596, SA0597                                 | partial |
| TECA4S            | SA0243, SA0244, SA0522, SA0523, SA0592, SA0593, SA0594, SA0595, SA0596, SA0597                                 | partial |
| THDPS             | SA1229                                                                                                         |         |
| THMabc            |                                                                                                                |         |
| THRD_L            | SA1271, SA1866                                                                                                 | yes     |
| THRS              | SA1165                                                                                                         |         |
| TKT2              | SA1177                                                                                                         |         |
| TMDS              | SA0311, SA1260                                                                                                 | yes     |
| TRDR              | SA0719, SA2162                                                                                                 | yes     |
| TRPS1             | SA1204, SA1205                                                                                                 | no      |
| TYRTA             | SA0679, SA2469                                                                                                 | yes     |
| UAG2E             | SA0150, SA0159, SA1913                                                                                         | yes     |
| UAG4E             |                                                                                                                |         |
| UAGCVT            | SA1902, SA1926                                                                                                 | yes     |
| UAGDP             | SA0457, SA1974                                                                                                 | yes     |
| UAPGR             | SA0693                                                                                                         |         |
| UDPG12dgrGT_SA2   |                                                                                                                |         |
| UDPG3g12dgrGT_SA2 |                                                                                                                |         |
| UMPK              | SA1309                                                                                                         |         |
| UNK3              |                                                                                                                |         |
| UPP3MT            | SA2186                                                                                                         |         |
| UPP3S             | SA1493                                                                                                         |         |
| UPPDC1            | SA1652                                                                                                         |         |
| VALTA             | SA0512                                                                                                         |         |
