# Supplementary material for: Genome-scale reconstruction of the metabolic network in Staphylococcus aureus N315: an initial draft to the two-dimensional annotation
Source: PubMed Central journal article supplement (PMC1079855; doi:10.1186/1471-2180-5-8), 2005-03-07
Supplement: 1471-2180-5-8-S7.pdf [file 1471-2180-5-8-S7.pdf]

| <b>Reaction Abbreviation</b> | <b>Gene Association</b>                        | <b>Isozymes?</b> |
|------------------------------|------------------------------------------------|------------------|
| ACCOAC                       | SA1357, SA1358, SA1434, SA1435, SA1522, SA1523 | no               |
| ADCL                         | SA0670                                         |                  |
| ADCS                         | SA0669                                         |                  |
| ADK1                         | SA2027                                         |                  |
| ADKd                         | SA2027                                         |                  |
| ADMDCr                       |                                                |                  |
| ADPT                         | SA1461                                         |                  |
| APRAUR                       | SA1586, SA1588                                 | no               |
| ASAD                         | SA1226                                         |                  |
| ASNS1                        | SA0922                                         |                  |
| ASPKi                        | SA1163, SA1225                                 | yes              |
| CHORS                        | SA1299                                         |                  |
| CLPNS_SA                     | SA1155, SA1891                                 | yes              |
| CYTK1                        | SA1309                                         |                  |
| DASYN_SA                     | SA1104                                         |                  |
| DB4PS                        | SA1587                                         |                  |
| DDPA                         | SA1558                                         |                  |
| DGK1                         | SA1052                                         |                  |
| DHDPRy                       | SA1228                                         |                  |
| DHDPS                        | SA1227                                         |                  |
| DHFR                         | SA1259                                         |                  |
| DHFS                         | SA1487                                         |                  |
| DHNPA2                       | SA0473                                         |                  |
| DHPPDA                       | SA1589                                         |                  |
| DHPS2                        | SA0472                                         |                  |
| DHQD                         | SA0756                                         |                  |
| DHQS                         | SA1298                                         |                  |
| DMATT                        | SA1352                                         |                  |
| DPMVD                        | SA0548                                         |                  |
| FE2abc                       | SA2337, SA2369                                 | yes              |
| FMNAT                        | SA1115                                         |                  |
| G1PACT                       | SA0457                                         |                  |
| G1SATi                       | SA1491, SA1681                                 | yes              |
| G3PCT                        | SA0597                                         |                  |
| G3PD2                        | SA1306                                         |                  |
| GALUi                        | SA2288                                         |                  |
| GCALDD                       | SA2406                                         |                  |
| GF6PTA                       | SA1959                                         |                  |
| GK1                          | SA1052                                         |                  |
| GLNS                         | SA1150                                         |                  |
| GLUTRR                       | SA1496                                         |                  |
| GLUTRS                       | SA0486                                         |                  |
| GRTT                         | SA1352                                         |                  |
| GTPCI                        | SA0683                                         |                  |
| GTPCII                       | SA1587                                         |                  |
| HCO3E                        | SA2287                                         |                  |
| HEMEOS                       | SA0965                                         |                  |

|            |                        |    |
|------------|------------------------|----|
| HMBS       | SA1494                 |    |
| HMGCOARi   | SA2333                 |    |
| HMGCOASi   | SA2334                 |    |
| HPPK2      | SA0474                 |    |
| IPDDI      | SA2136                 |    |
| KAS1       | SA0842, SA0843         | no |
| KAS11      | SA0842, SA0843         | no |
| KAS12      | SA0842, SA0843         | no |
| KAS13      | SA0842, SA0843         | no |
| KAS19SA    | SA0842, SA0843         | no |
| KAS2       | SA0842, SA0843         | no |
| KAS20SA    | SA0842, SA0843         | no |
| KAS3       | SA0842, SA0843         | no |
| KAS4       | SA0842, SA0843         | no |
| KAS6       | SA0842, SA0843         | no |
| KAS8       | SA0842, SA0843         | no |
| MDRPD      |                        |    |
| METAT      | SA1608                 |    |
| MTAN       | SA1427                 |    |
| MTRI       |                        |    |
| MTRK       |                        |    |
| NACUP      |                        |    |
| NADK       | SA0865                 |    |
| NADS1      | SA1728                 |    |
| NAPRTr     | SA1729                 |    |
| NDPK1      | SA1301                 |    |
| NDPK2      | SA1301                 |    |
| NDPK3      | SA1301                 |    |
| NDPK8      | SA1301                 |    |
| NNATr      | SA1422                 |    |
| OIVD1      | SA1346, SA1347, SA1348 | no |
| OIVD2      | SA1346, SA1347, SA1348 | no |
| OIVD3      | SA1346, SA1347, SA1348 | no |
| PALASA_SA2 |                        |    |
| PAPA_SA    |                        |    |
| PASYN_SA   |                        |    |
| PGAMT      | SA1965                 |    |
| PGLYSA_SA2 |                        |    |
| PGMT       | SA1965                 |    |
| PGPP_SA    | SA1250                 |    |
| PGSA_SA    | SA1126                 |    |
| PLEUSA_SA2 |                        |    |
| PLYSSA_SA2 |                        |    |
| PMDPHT     | SA1586, SA1588         | no |
| PMEVK      | SA0549                 |    |
| PPA        | SA1735                 |    |
| PPBNGS     | SA1492                 |    |
| PRPPS      | SA0458                 |    |

|                   |                                                                                                                |         |
|-------------------|----------------------------------------------------------------------------------------------------------------|---------|
| PSCVT             | SA1297                                                                                                         |         |
| PSD_SA            |                                                                                                                |         |
| PSSA_SA           |                                                                                                                |         |
| RBFK              | SA1115                                                                                                         |         |
| RBFSa             | SA1588                                                                                                         |         |
| RBFSb             | SA1586                                                                                                         |         |
| RPE               | SA1065                                                                                                         |         |
| RPI               | SA2127                                                                                                         |         |
| SDPDS             | SA1572, SA1814                                                                                                 | yes     |
| SDPTA             | SA2347                                                                                                         |         |
| SHCHD2            | SA2412                                                                                                         |         |
| SHCHF             | SA2412                                                                                                         |         |
| SHK3Dr            | SA1424                                                                                                         |         |
| SHKK              | SA1368                                                                                                         |         |
| SPMS              |                                                                                                                |         |
| TAGO              |                                                                                                                |         |
| TECA1S            | SA0243, SA0244, SA0522, SA0523, SA0592, SA0593, SA0594, SA0595, SA0596, SA0597                                 | partial |
| TECA2S            | SA0243, SA0244, SA0522, SA0523, SA0592, SA0593, SA0594, SA0595, SA0596, SA0597, SA0793, SA0794, SA0795, SA0796 | partial |
| TECA3S            | SA0243, SA0244, SA0522, SA0523, SA0592, SA0593, SA0594, SA0595, SA0596, SA0597                                 | partial |
| TECA4S            | SA0243, SA0244, SA0522, SA0523, SA0592, SA0593, SA0594, SA0595, SA0596, SA0597                                 | partial |
| THDPS             | SA1229                                                                                                         |         |
| THMabc            |                                                                                                                |         |
| TKT2              | SA1177                                                                                                         |         |
| TRDR              | SA0719, SA2162                                                                                                 | yes     |
| UAG2E             | SA0150, SA0159, SA1913                                                                                         | yes     |
| UAG4E             |                                                                                                                |         |
| UAGCVT            | SA1902, SA1926                                                                                                 | yes     |
| UAGDP             | SA0457, SA1974                                                                                                 | yes     |
| UAPGR             | SA0693                                                                                                         |         |
| UDPG12dgrGT_SA2   |                                                                                                                |         |
| UDPG3g12dgrGT_SA2 |                                                                                                                |         |
| UMPK              | SA1309                                                                                                         |         |
| UNK3              |                                                                                                                |         |
| UPP3MT            | SA2186                                                                                                         |         |
| UPP3S             | SA1493                                                                                                         |         |
