# Supplementary material for: Genome-scale reconstruction of the metabolic network in Staphylococcus aureus N315: an initial draft to the two-dimensional annotation
Source: PubMed Central journal article supplement (PMC1079855; doi:10.1186/1471-2180-5-8), 2005-03-07
Supplement: 1471-2180-5-8-S8.pdf [file 1471-2180-5-8-S8.pdf]

| ABBREVIATION | NAME                                                                                                   | ORF                                                                     |
|--------------|--------------------------------------------------------------------------------------------------------|-------------------------------------------------------------------------|
| 3M2OBLOXRD   | 3-Methyl-2-oxobutanoate:lipoamide oxidoreductase(decarboxylating and acceptor-2-methylpropanoylating)  | ( SA1348 and SA1347 )                                                   |
| 3M2OPLOXRD   | 3-Methyl-2-oxopentanoate:lipoamide oxidoreductase(decarboxylating and acceptor-2-methylpropanoylating) | ( SA1348 and SA1347 )                                                   |
| 4M2OPLOXRD   | 4-Methyl-2-oxopentanoate:lipoamide oxidoreductase(decarboxylating and acceptor-2-methylpropanoylating) | ( SA1348 and SA1347 )                                                   |
| 6PGALSZ      | 6-phospho-beta-galactosidase                                                                           | SA1991                                                                  |
| 6PHBG        | 6-phospho-beta-glucosidase                                                                             | SA0256                                                                  |
| ABTAr        | 4-aminobutyrate transaminase                                                                           | SA2397                                                                  |
| ACACT1r      | acetyl-CoA C-acetyltransferase                                                                         | ( SA0342 or ( SA0223 or SA0534 ) )                                      |
| ACACT2r      | acetyl-CoA C-acyltransferase (butanoyl-CoA) (r)                                                        | ( SA0342 or ( SA0223 or SA0534 ) )                                      |
| ACACT3r      | acetyl-CoA C-acyltransferase (hexanoyl-CoA) (r)                                                        | ( SA0223 or SA0534 )                                                    |
| ACACT4r      | acetyl-CoA C-acyltransferase (octanoyl-CoA) (r)                                                        | ( SA0223 or SA0534 )                                                    |
| ACACT5r      | acetyl-CoA C-acyltransferase (decanoyl-CoA) (r)                                                        | ( SA0223 or SA0534 )                                                    |
| ACACT6r      | acetyl-CoA C-acyltransferase (dodecanoyl-CoA) (r)                                                      | ( SA0223 or SA0534 )                                                    |
| ACACT7r      | acetyl-CoA C-acyltransferase (tetradecanoyl-CoA) (r)                                                   | ( SA0223 or SA0534 )                                                    |
| ACALDi       | acetaldehyde dehydrogenase (acetylating)                                                               | SA0143                                                                  |
| ACCOAC       | acetyl-CoA carboxylase                                                                                 | ( SA1522 and ( SA1435 or SA1358 ) and ( SA1357 or SA1434 ) and SA1523 ) |
| ACGApts      | N-Acetyl-D-glucosamine transport via PEP:Pyr PTS                                                       | SA1547                                                                  |
| ACGK         | acetylglutamate kinase                                                                                 | SA0176                                                                  |
| ACGS         | N-acetylglutamate synthase                                                                             | SA0177                                                                  |
| ACHBS        | 2-aceto-2-hydroxybutanoate synthase                                                                    | ( ( SA1859 or SA2008 ) and SA1860 )                                     |
| ACKr         | acetate kinase                                                                                         | SA1533                                                                  |
| ACLDC        | acetolactate decarboxylase                                                                             | ( SA2394 or SA2007 )                                                    |
| ACLS         | acetolactate synthase                                                                                  | ( ( SA1859 or SA2008 ) and SA1860 )                                     |
| ACNAMi2      | N-acetylneuraminate proton symport                                                                     | SA0531                                                                  |
| ACNML        | N-Acetylneuraminate lyase                                                                              | SA0304                                                                  |
| ACOAD1       | acyl-CoA dehydrogenase (butanoyl-CoA)                                                                  | SA2080                                                                  |
| ACOAD2       | acyl-CoA dehydrogenase (hexanoyl-CoA)                                                                  | SA2080                                                                  |
| ACOAD3       | acyl-CoA dehydrogenase (octanoyl-CoA)                                                                  | SA2080                                                                  |
| ACOAD4       | acyl-CoA dehydrogenase (decanoyl-CoA)                                                                  | SA2080                                                                  |
| ACOAD5       | acyl-CoA dehydrogenase (dodecanoyl-CoA)                                                                | SA2080                                                                  |
| ACOAD6       | acyl-CoA dehydrogenase (tetradecanoyl-CoA)                                                             | SA2080                                                                  |
| ACOAD7       | acyl-CoA dehydrogenase (hexadecanoyl-CoA)                                                              | SA2080                                                                  |
| ACOATA       | Acetyl-CoA ACP transacylase                                                                            | SA0842                                                                  |
| ACONT        | aconitase                                                                                              | SA1184                                                                  |
| ACOTA        | acetylmethionine transaminase                                                                          | SA0179                                                                  |
| ACPS1        | acyl-carrier protein synthase                                                                          | SA1875                                                                  |
| ACPpds       | [acyl-carrier-protein] phosphodiesterase                                                               | SA0204                                                                  |
| ACS          | acetyl-CoA synthetase                                                                                  | ( SA2402 and SA1554 )                                                   |
| ACYP_2       | acylphosphatase (2)                                                                                    | SA1236                                                                  |
| ADCL         | 4-aminobenzoate synthase                                                                               | SA0670                                                                  |
| ADCS         | 4-amino-4-deoxychorismate synthase                                                                     | SA0669                                                                  |
| ADCYRS       | adenosylcobyrinic acid synthase (glutamine-hydrolysing)                                                | SA1707                                                                  |
| ADK1         | adenylate kinase                                                                                       | SA2027                                                                  |
| ADKd         | adenylate kinase (d form)                                                                              | SA2027                                                                  |
| ADMDCr       | Adenosylmethionine decarboxylase                                                                       |                                                                         |
| ADNi2        | adenosine transport in via proton symport                                                              |                                                                         |
| ADPRDP       | ADP-ribose diphosphatase                                                                               | SA1330                                                                  |
| ADPT         | adenine phosphoribosyltransferase                                                                      | SA1461                                                                  |
| ADSK         | adenylyl-sulfate kinase                                                                                | SA2456                                                                  |
| ADSL1        | adenylosuccinate lyase                                                                                 | SA1724                                                                  |
| ADSL2r       | adenylosuccinate lyase                                                                                 | SA1724                                                                  |

|          |                                                                     |                                                                                                    |
|----------|---------------------------------------------------------------------|----------------------------------------------------------------------------------------------------|
| ADSS     | adenylosuccinate synthase                                           | SA0016                                                                                             |
| AGDC_r   | N-acetylglucosamine-6-phosphate deacetylase (reversible)            | SA0656                                                                                             |
| AGMHE    | ADP-D-glycero-D-manno-heptose epimerase                             | SA0123                                                                                             |
| AGMT     | agmatinase                                                          | SA1968                                                                                             |
| AGPR     | N-acetyl-g-glutamyl-phosphate reductase                             | SA0178                                                                                             |
| AHCYSNS  | S-adenosylhomocysteine nucleosidase                                 | SA1427                                                                                             |
| AICART   | phosphoribosylaminoimidazolecarboxamide formyltransferase           | SA0925                                                                                             |
| AIRC2    | phosphoribosylaminoimidazole carboxylase                            | SA0917                                                                                             |
| AIRC3    | phosphoribosylaminoimidazole carboxylase (mutase rxn)               | SA0916                                                                                             |
| AKGDa    | oxoglutarate dehydrogenase (lipoamide)                              | SA1245                                                                                             |
| AKGDb    | oxoglutarate dehydrogenase (dihydrolipoamide S-succinyltransferase) | SA1244                                                                                             |
| AKGMAL   | alpha-ketoglutarate/malate transporter                              | SA2486                                                                                             |
| AKP1     | alkaline phosphatase (Dihydroneopterin)                             | SA2420                                                                                             |
| ALAALAr  | D-alanine-D-alanine ligase (reversible)                             | SA1887                                                                                             |
| ALAD_L   | L-alanine dehydrogenase                                             | ( SA1272 or SA1531 )                                                                               |
| ALAR     | alanine racemase                                                    | ( SA1874 or SA1231 )                                                                               |
| ALATA_D  | D-alanine transaminase                                              | SA1571                                                                                             |
| ALATRS   | Alanyl-tRNA synthetase                                              | SA1446                                                                                             |
| ALAabc   | L-alanine transport via ABC system                                  | ( SA1519 and SA2226 and SA2227 )                                                                   |
| ALAt2r   | L-alanine reversible transport via proton symport                   | ( SA1190 or SA0871 )                                                                               |
| ALCD1    | alcohol dehydrogenase (methanol)                                    | SA1170                                                                                             |
| ALCD2x   | alcohol dehydrogenase (ethanol)                                     | SA0562                                                                                             |
| ALDD2x   | aldehyde dehydrogenase (acetaldehyde, NAD)                          | ( SA0162 and SA1736 )                                                                              |
| ALKP     | alkaline phosphatase                                                | SA2420                                                                                             |
| AMAA     | N-acetylmuramoyl-L-alanine amidase                                  | ( SA1458 or SA0905 or SA2100 or SA2437 )                                                           |
| AMANAPer | N-acetylmannosamine 6-phosphate epimerase                           | SA0307                                                                                             |
| AMANK    | N-acetyl-D-mannosamine kinase                                       | SA0715                                                                                             |
| AMAOTr   | adenosylmethionine-8-amino-7-oxononanoate transaminase              | SA2214                                                                                             |
| ANPRT    | anthranilate phosphoribosyltransferase                              | SA1201                                                                                             |
| ANS      | anthranilate synthase                                               | ( SA1199 and ( SA1200 or SA0668 ) )                                                                |
| AOXSr    | 8-amino-7-oxononanoate synthase                                     | SA2212                                                                                             |
| APRAUR   | 5-amino-6-(5-phosphoribosylamino)uracil reductase                   | ( SA1588 and SA1586 )                                                                              |
| ARGDC    | arginine decarboxylase                                              | SA0439                                                                                             |
| ARGDr    | arginine deiminase                                                  | SA2428                                                                                             |
| ARGN     | arginase                                                            | SA1968                                                                                             |
| ARGORN7  | arginine/ornithine antiporter                                       | SA2426                                                                                             |
| ARGSL    | argininosuccinate lyase                                             | SA0821                                                                                             |
| ARGSSr   | argininosuccinate synthase, reversible                              | SA0822                                                                                             |
| ARGTRS   | Arginyl-tRNA synthetase                                             | SA0564                                                                                             |
| ASAD     | aspartate-semialdehyde dehydrogenase                                | SA1226                                                                                             |
| ASNN     | L-asparaginase                                                      | SA1310                                                                                             |
| ASNS1    | asparagine synthase (glutamine-hydrolysing)                         | SA0922                                                                                             |
| ASNTRS   | Asparaginyl-tRNA synthetase                                         | SA1287                                                                                             |
| ASP1DC   | aspartate 1-decarboxylase                                           | SA2390                                                                                             |
| ASPCT    | aspartate carbamoyltransferase                                      | SA1043                                                                                             |
| ASPKi    | aspartate kinase, irreversible                                      | ( SA1163 or SA1225 )                                                                               |
| ASPTA    | aspartate transaminase                                              | SA1749                                                                                             |
| ASPTRS   | Aspartyl-tRNA synthetase                                            | SA1456                                                                                             |
| ASPabc   | L-aspartate transport via ABC system                                |                                                                                                    |
| ATPM     | ATP maintenance requirement                                         |                                                                                                    |
| ATPPRT   | ATP phosphoribosyltransferase                                       | SA2471                                                                                             |
| ATPS4r   | ATP synthase (four protons for one ATP)                             | ( SA1907 and SA1911 and SA1904 and SA1905 and SA1909 and SA1906 and SA1908 and SA1910 and SA1912 ) |
| BACCL    | biotin-[acetyl-CoA-carboxylase] ligase                              | SA1289                                                                                             |

|           |                                                               |                                                                                      |
|-----------|---------------------------------------------------------------|--------------------------------------------------------------------------------------|
| BETALDHx  | betaine-aldehyde dehydrogenase                                | SA2406                                                                               |
| BETALDHy  | betaine-aldehyde dehydrogenase                                | SA2406                                                                               |
| BPNT      | 3',5'-biphosphate nucleotidase                                |                                                                                      |
| BTNt2i    | Biotin uptake                                                 |                                                                                      |
| BTS3r     | biotin synthase                                               | SA2213                                                                               |
| CAT       | catalase                                                      | SA1170                                                                               |
| CBMK      | Carbamate kinase                                              | ( SA1013 or SA2425 )                                                                 |
| CBPS      | carbamoyl-phosphate synthase (glutamine-hydrolysing)          | ( SA1045 and SA1046 )                                                                |
| CDAPPA_SA | CDP-Diacylglycerol pyrophosphatase (Saureus)                  |                                                                                      |
| CDPMEK    | 4-(cytidine 5'-diphospho)-2-C-methyl-D-erythritol kinase      | SA0453                                                                               |
| CHCOAL    | 6-carboxyhexanoate-CoA ligase                                 | SA2211                                                                               |
| CHLabc    | choline transport via ABC system                              | (( SA2237 and SA2236 and SA2235 and SA2234 ) or ( SA0678 and SA0677 ))               |
| CHL2r     | choline transport via proton symport, reversible              | SA2408                                                                               |
| CHOLD     | choline dehydrogenase                                         | SA2405                                                                               |
| CHORM     | chorismate mutase                                             | SA1558                                                                               |
| CHORS     | chorismate synthase                                           | SA1299                                                                               |
| CIT-Mgt   | citrate-Mg transport in via proton symport                    | SA2411                                                                               |
| CLPNS_SA  | Cardiolipin Synthase (Saureus)                                | ( SA1891 or SA1155 )                                                                 |
| CO2t      | CO2 transporter via diffusion                                 |                                                                                      |
| CPPPGO    | coproporphyrinogen oxidase (O2 required)                      | SA1412                                                                               |
| CRNabc    | L-carnitine transport via ABC system                          | (( SA2237 and SA2236 and SA2235 and SA2234 ) or ( SA0678 and SA0677 ))               |
| CS        | citrate synthase                                              | SA1518                                                                               |
| CSNt2     | cytosine transport in via proton symport                      |                                                                                      |
| CTPS1     | CTP synthase (NH3)                                            | SA1929                                                                               |
| CYSS      | cysteine synthase                                             | ( SA0471 or SA0418 )                                                                 |
| CYSTL     | cystathionine b-lyase                                         | SA0346                                                                               |
| CYSTRS    | CysteinyI-tRNA synthetase                                     | SA0488                                                                               |
| CYSabc    | L-cysteine transport via ABC system                           |                                                                                      |
| CYTBD     | cytochrome oxidase bd (ubiquinol-8: 2 protons)                | ( SA0937 and SA0938 and SA0913 and SA0912 and SA0911 and SA0910 )                    |
| CYTD      | cytidine deaminase                                            | SA1397                                                                               |
| CYTDK2    | cytidine kinase (GTP)                                         | SA1439                                                                               |
| CYTDt4    | cytidine transport in via sodium symport                      | ( SA0302 or SA0479 or SA0600 )                                                       |
| CYTK1     | cytidylate kinase (CMP)                                       | SA1309                                                                               |
| CYTK2     | cytidylate kinase (dCMP)                                      | SA1309                                                                               |
| Coabc     | Cobalt transport via ABC system                               | (( SA0928 and SA0927 ) or ( SA2020 and SA2021 and SA2019 ) or ( SA2476 and SA2475 )) |
| Cut1      | Copper export via ATPase                                      | SA2344                                                                               |
| D-LACT2   | D-lactate transport via proton symport                        |                                                                                      |
| DAGK_SA   | Diacylglycerol kinase                                         | SA1398                                                                               |
| DALAt2r   | D-alanine transport via proton symport                        | ( SA1190 or SA0871 )                                                                 |
| DAPDC     | diaminopimelate decarboxylase                                 | ( SA1232 or SA0119 )                                                                 |
| DAPE      | diaminopimelate epimerase                                     |                                                                                      |
| DASYN_SA  | CDP-Diacylglycerol synthetase (Saureus)                       | SA1104                                                                               |
| DB4PS     | 3,4-Dihydroxy-2-butanone-4-phosphate                          | SA1587                                                                               |
| DBTSr     | dethiobiotin synthase                                         | SA2215                                                                               |
| DCMPDA    | dCMP deaminase                                                | SA1417                                                                               |
| DDPA      | 3-deoxy-D-arabino-heptulosonate 7-phosphate synthetase        | SA1558                                                                               |
| DGK1      | deoxyguanylate kinase (dGMP:ATP)                              | SA1052                                                                               |
| DHAD1     | dihydroxy-acid dehydratase (2,3-dihydroxy-3-methylbutanoate)  | SA1858                                                                               |
| DHAD2     | Dihydroxy-acid dehydratase (2,3-dihydroxy-3-methylpentanoate) | SA1858                                                                               |
| DHAK      | dihydroxyacetone kinase                                       | SA0605                                                                               |
| DHDPRy    | dihydrodipicolinate reductase (NADPH)                         | SA1228                                                                               |
| DHDPS     | dihydrodipicolinate synthase                                  | SA1227                                                                               |
| DHFR      | dihydrofolate reductase                                       | SA1259                                                                               |

|           |                                                               |                       |
|-----------|---------------------------------------------------------------|-----------------------|
| DHFS      | dihydrofolate synthase                                        | SA1487                |
| DHNAOT    | 1,4-dihydroxy-2-naphthoate octaprenyltransferase              | SA0894                |
| DHNPA2    | dihydroneopterin aldolase                                     | SA0473                |
| DHORD5    | dihydroorotic acid (menaquinone-8)                            | SA2375                |
| DHORTS    | dihydroorotase                                                | SA1044                |
| DHPPDA    | diaminohydroxyphosphoribosylaminopyrimidine deaminase         | SA1589                |
| DHPS2     | dihydropteroate synthase                                      | SA0472                |
| DHQD      | 3-dehydroquininate dehydratase                                | SA0756                |
| DHQS      | 3-dehydroquininate synthase                                   | SA1298                |
| DKMPPD    | 2,3-diketo-5-methylthio-1-phosphopentane degradation reaction |                       |
| DKMPPD2   | 2,3-diketo-5-methylthio-1-phosphopentane degradation reaction |                       |
| DMATT     | dimethylallyltranstransferase                                 | SA1352                |
| DNMPPA    | Dihydroneopterin monophosphate dephosphorylase                | SA1313                |
| DNTPPA    | Dihydroneopterin triphosphate pyrophosphatase                 | SA1313                |
| DPCOAK    | dephospho-CoA kinase                                          | SA1511                |
| DPMVD     | diphosphomevalonate decarboxylase                             | SA0548                |
| DPR       | 2-dehydropantoate 2-reductase                                 | ( SA2232 or SA2393 )  |
| DRBK      | Deoxyribokinase                                               | SA0258                |
| DRPA      | deoxyribose-phosphate aldolase                                | ( SA0133 or SA1939 )  |
| DTMPK     | dTMP kinase                                                   | SA0440                |
| DURIK1    | deoxyuridine kinase (ATP:Deoxyuridine)                        | SA1921                |
| DURIPP    | deoxyuridine phosphorylase                                    | ( SA1940 or SA0131 )  |
| ECOAH1    | 3-hydroxyacyl-CoA dehydratase (3-hydroxybutanoyl-CoA)         | SA0224                |
| ECOAH2    | 3-hydroxyacyl-CoA dehydratase (3-hydroxyhexanoyl-CoA)         | SA0224                |
| ECOAH3    | 3-hydroxyacyl-CoA dehydratase (3-hydroxyoctanoyl-CoA)         | SA0224                |
| ECOAH4    | 3-hydroxyacyl-CoA dehydratase (3-hydroxydecanoyl-CoA)         | SA0224                |
| ECOAH5    | 3-hydroxyacyl-CoA dehydratase (3-hydroxydodecanoyl-CoA)       | SA0224                |
| ECOAH6    | 3-hydroxyacyl-CoA dehydratase (3-hydroxytetradecanoyl-CoA)    | SA0224                |
| ECOAH7    | 3-hydroxyacyl-CoA dehydratase (3-hydroxyhexadecanoyl-CoA)     | SA0224                |
| ENO       | enolase                                                       | SA0731                |
| ETOHt     | ethanol reversible transport                                  |                       |
| FACOAL160 | fatty-acid--CoA ligase (hexadecanoate)                        | SA0226                |
| FBA       | fructose-bisphosphate aldolase                                | ( SA1927 or SA2399 )  |
| FBP       | fructose-bisphosphatase                                       | SA2304                |
| FCLT      | Ferrochelataase                                               | SA1651                |
| FDHr      | formate dehydrogenase                                         | ( SA0171 and SA2102 ) |
| FE2abc    | iron (II) transport via ABC system                            | ( SA2337 or SA2369 )  |
| FFSDr     | beta-fructofuranosidase                                       | SA1846                |
| FGLU      | formimidoylglutamase                                          | SA2125                |
| FLDO      | NAD(P)H-flavin oxidoreductase                                 | ( SA0328 or SA0518 )  |
| FLVR      | flavin reductase                                              | SA2311                |
| FLVR(NAD) | flavin reductase (NAD)                                        | SA2311                |
| FMNAT     | FMN adenyltransferase                                         | SA1115                |
| FMNRx     | FMN reductase                                                 | SA0817                |
| FORt2     | formate transport in via proton symport                       | SA0293                |
| FORt3     | formate transport out via proton antiport                     | SA0293                |
| FRUK      | fructose-1-phosphate kinase                                   | SA0654                |
| FRUpts    | D-fructose transport via PEP:Pyr PTS                          | SA0655                |
| FTHFL     | formate-tetrahydrofolate ligase                               | SA0915                |
| FUM       | fumarase                                                      | SA1669                |
| G1PACT    | glucosamine-1-phosphate N-acetyltransferase                   | SA0457                |
| G1SATI    | glutamate-1-semialdehyde aminotransferase                     | ( SA1491 or SA1681 )  |
| G3PCT     | glycerol-3-phosphate cytidyltransferase                       | SA0597                |
| G3PD2     | glycerol-3-phosphate dehydrogenase (NADP)                     | SA1306                |

|            |                                                                      |                                                                         |
|------------|----------------------------------------------------------------------|-------------------------------------------------------------------------|
| G3PD5      | glycerol-3-phosphate dehydrogenase (ubiquinone-8)                    | SA1142                                                                  |
| G3PD6      | glycerol-3-phosphate dehydrogenase (menaquinone-8)                   | SA1142                                                                  |
| G3PD7      | glycerol-3-phosphate dehydrogenase (demethylmenaquinone-8)           | SA1142                                                                  |
| G6PDA      | glucosamine-6-phosphate deaminase                                    | SA0527                                                                  |
| G6PDH2r    | glucose 6-phosphate dehydrogenase                                    | SA1336                                                                  |
| GAL6PI     | galactose-6-phosphate isomerase                                      | ( SA1997 and SA1996 )                                                   |
| GALTpts    | Galactitol transport via PEP:Pyr PTS                                 | ( SA0236 and SA0237 and SA0238 )                                        |
| GALUi      | UTP-glucose-1-phosphate uridylyltransferase (irreversible)           | SA2288                                                                  |
| GAPD       | glyceraldehyde-3-phosphate dehydrogenase                             | ( SA0727 or SA1510 )                                                    |
| GARFT      | phosphoribosylglycinamide formyltransferase                          | SA0924                                                                  |
| GCALDD     | Glycolaldehyde dehydrogenase                                         | SA2406                                                                  |
| GCCa       | glycine-cleavage complex                                             | ( SA1365 and SA1366 )                                                   |
| GCCb       | glycine cleavage complex                                             | ( SA0760 and SA1367 )                                                   |
| GCCc       | glycine-cleavage complex                                             | ( SA1349 or SA0946 )                                                    |
| GF6PTA     | glutamine-fructose-6-phosphate transaminase                          | SA1959                                                                  |
| GHMT2      | glycine hydroxymethyltransferase                                     | SA1915                                                                  |
| GK1        | guanylate kinase (GMP:ATP)                                           | SA1052                                                                  |
| GLCNt2r    | D-gluconate transport via proton symport, reversible                 | SA2293                                                                  |
| GLCPcom_SA | Glucosyl Phosphoglycerol Combination (SA)                            |                                                                         |
| GLCS1      | glycogen synthase (ADPGlc)                                           | SA1291                                                                  |
| GLCpts     | D-glucose transport via PEP:Pyr PTS                                  | ( SA0183 and SA1255 and ( SA2326 or SA0233 ) )                          |
| GLGC       | glucose-1-phosphate adenyltransferase                                | SA2288                                                                  |
| GLNS       | glutamine synthetase                                                 | SA1150                                                                  |
| GLUDx      | glutamate dehydrogenase (NAD)                                        | SA0819                                                                  |
| GLUPRT     | glutamine phosphoribosyldiphosphate amidotransferase                 | SA0922                                                                  |
| GLUR       | glutamate racemase                                                   | SA0997                                                                  |
| GLUSx      | glutamate synthase (NADH2)                                           | (( SA0430 or SA2248 ) and SA0431 )                                      |
| GLUTRR     | glutamyl-tRNA reductase                                              | SA1496                                                                  |
| GLUTRS     | Glutamyl-tRNA synthetase                                             | SA0486                                                                  |
| GLUabc     | L-glutamate transport via ABC system                                 | ( SA1674 and SA1675 )                                                   |
| GLUt2      | L-glutamate transport in via proton symport                          | SA2172                                                                  |
| GLUt2r     | L-glutamate transport via proton symport, reversible                 | ( SA2172 or SA2135 )                                                    |
| GLYALDt    | Glyceraldehyde facilitated diffusion                                 | SA1140                                                                  |
| GLYAT      | glycine C-acetyltransferase                                          | SA0508                                                                  |
| GLYBabc    | Glycine betaine transport via ABC system                             | (( SA2237 and SA2236 and SA2235 and SA2234 ) or ( SA0678 and SA0677 ) ) |
| GLYBi2r    | Glycine betaine transport via proton symport, reversible             | ( SA1987 or SA1183 )                                                    |
| GLYC3Pabc  | sn-Glycerol 3-phosphate transport via ABC system                     | ( SA0207 and SA0208 and SA0209 and SA0206 )                             |
| GLYC3Pt6   | Glycerol-3-phosphate : phosphate antiporter                          | SA0325                                                                  |
| GLYCK      | glycerate kinase                                                     | ( SA2220 or SA0697 )                                                    |
| GLYct      | glycerol transport via channel                                       | SA1140                                                                  |
| GLYD       | glycerate dehydrogenase                                              | SA2098                                                                  |
| GLYKr      | glycerol kinase (reversible)                                         | SA1141                                                                  |
| GLYTRS     | Glycyl-tRNA synthetase                                               | SA1394                                                                  |
| GLYabc     | glycine transport via ABC system                                     | ( SA1519 and SA2226 and SA2227 )                                        |
| GMHEPAT    | D-glycero-D-manno-hepse 1-phosphate adenyltransferase                | SA0597                                                                  |
| GMHEPK     | D-glycero-D-manno-heptose 7-phosphate kinase                         | SA0597                                                                  |
| GMHEPPA    | D-glycero-D-manno-heptose 1,7-bisphosphate phosphatase               | SA0513                                                                  |
| GMPR       | GMP reductase                                                        | SA1172                                                                  |
| GMPS2      | GMP synthase                                                         | SA0376                                                                  |
| GND        | phosphogluconate dehydrogenase                                       | SA1342                                                                  |
| GNK        | gluconokinase                                                        | SA2294                                                                  |
| GPDDA1     | Glycerophosphodiester phosphodiesterase (Glycerophosphocholine)      | ( SA0220 or SA0820 or SA0969 or SA1542 or SA0036 )                      |
| GPDDA2     | Glycerophosphodiester phosphodiesterase (Glycerophosphoethanolamine) | ( SA0220 or SA0820 or SA0969 or SA1542 or SA0036 )                      |
| GPDDA3     | Glycerophosphodiester phosphodiesterase (Glycerophosphoserine)       | ( SA0220 or SA0820 or SA0969 or SA1542 or SA0036 )                      |

|          |                                                                  |                                                    |
|----------|------------------------------------------------------------------|----------------------------------------------------|
| GPDDA4   | Glycerophosphodiester phosphodiesterase (Glycerophosphoglycerol) | ( SA0220 or SA0820 or SA0969 or SA1542 or SA0036 ) |
| GPDDA5   | Glycerophosphodiester phosphodiesterase (Glycerophosphoinositol) | ( SA0220 or SA0820 or SA0969 or SA1542 or SA0036 ) |
| GRIT     | geranyltransferase                                               | SA1352                                             |
| GTHP     | glutathione perioxidase                                          | ( SA2414 or SA1146 )                               |
| GTPCI    | GTP cyclohydrolase I                                             | SA0683                                             |
| GTPCII   | GTP cyclohydrolase II                                            | SA1587                                             |
| GTPDPK   | GTP diphosphokinase                                              | ( SA1460 or SA0864 )                               |
| GUAPRT   | guanine phosphoribosyltransferase                                | SA1461                                             |
| GUAt2    | guanine transport in via proton symport                          |                                                    |
| H2Ot     | H2O transport via diffusion                                      |                                                    |
| HACD1    | 3-hydroxyacyl-CoA dehydrogenase (acetoacetyl-CoA)                | SA0224                                             |
| HACD2    | 3-hydroxyacyl-CoA dehydrogenase (3-oxohexanoyl-CoA)              | SA0224                                             |
| HACD3    | 3-hydroxyacyl-CoA dehydrogenase (3-oxooctanoyl-CoA)              | SA0224                                             |
| HACD4    | 3-hydroxyacyl-CoA dehydrogenase (3-oxodecanoyl-CoA)              | SA0224                                             |
| HACD5    | 3-hydroxyacyl-CoA dehydrogenase (3-oxododecanoyl-CoA)            | SA0224                                             |
| HACD6    | 3-hydroxyacyl-CoA dehydrogenase (3-oxotetradecanoyl-CoA)         | SA0224                                             |
| HACD7    | 3-hydroxyacyl-CoA dehydrogenase (3-oxohexadecanoyl-CoA)          | SA0224                                             |
| HCO3E    | HCO3 equilibration reaction                                      | SA2287                                             |
| HCYSMT   | homocysteine S-methyltransferase                                 | SA0345                                             |
| HDCAt2   | Hexadecanoate transport via proton symport                       |                                                    |
| HEMEAS   | Heme A synthase                                                  | SA0964                                             |
| HEMEOS   | Heme O synthase                                                  | SA0965                                             |
| HEMEti   | Heme transport via ABC system                                    |                                                    |
| HETZK    | hydroxyethylthiazole kinase                                      | SA1895                                             |
| HEX1     | hexokinase (D-glucose:ATP)                                       | SA1377                                             |
| HEX7     | hexokinase (D-fructose:ATP)                                      | SA1845                                             |
| HEXTT    | trans-hexaprenyltransferase                                      | SA1302                                             |
| HISDr    | histidase_r                                                      | SA0008                                             |
| HISTD    | histidinol dehydrogenase                                         | SA2470                                             |
| HISTP    | histidinol-phosphatase                                           |                                                    |
| HISabc   | L-histidine transport via ABC system                             |                                                    |
| HMBS     | hydroxymethylbilane synthase                                     | SA1494                                             |
| HMGCOAi  | Hydroxymethylglutaryl CoA reductase (ir)                         | SA2333                                             |
| HMGCOASi | Hydroxymethylglutaryl CoA synthase (ir)                          | SA2334                                             |
| HPPK2    | 6-hydroxymethyl-dihydropterin pyrophosphokinase                  | SA0474                                             |
| HSDy     | homoserine dehydrogenase (NADPH)                                 | SA1164                                             |
| HSERTA   | homoserine O-trans-acetylase                                     | SA0011                                             |
| HSK      | homoserine kinase                                                | SA1166                                             |
| HSTPT    | histidinol-phosphate transaminase                                | ( SA0679 or SA2469 )                               |
| HXPRT    | hypoxanthine phosphoribosyltransferase (Hypoxanthine)            | SA0468                                             |
| ICDHyr   | isocitrate dehydrogenase (NADP)                                  | SA1517                                             |
| ICHORS   | isochorismate synthase                                           | SA0895                                             |
| IG3PS    | Imidazole-glycerol-3-phosphate synthase                          | ( SA2465 and SA2467 )                              |
| IGPDH    | imidazoleglycerol-phosphate dehydratase                          | SA2468                                             |
| IGPS     | indole-3-glycerol-phosphate synthase                             | SA1202                                             |
| ILETA    | isoleucine transaminase                                          | SA0512                                             |
| ILETRS   | Isoleucyl-tRNA synthetase                                        | SA1036                                             |
| ILEabc   | L-isoleucine transport via ABC system                            |                                                    |
| ILEt2r   | L-isoleucine reversible transport via proton symport             | ( SA0180 or SA1239 )                               |
| IMPC     | IMP cyclohydrolase                                               | SA0925                                             |
| IMPD     | IMP dehydrogenase                                                | SA0375                                             |
| INDPYRD  | Indole-3-pyruvate carboxylase                                    | SA0182                                             |
| IPDDI    | isopentenyl-diphosphate D-isomerase                              | SA2136                                             |
| IPMD     | 3-isopropylmalate dehydrogenase                                  | SA1863                                             |

|          |                                                          |                                                                            |
|----------|----------------------------------------------------------|----------------------------------------------------------------------------|
| IPPMla   | 3-isopropylmalate dehydratase                            | ( SA1864 and SA1865 )                                                      |
| IPPMlb   | 2-isopropylmalate hydratase                              | ( SA1864 and SA1865 )                                                      |
| IPPS     | 2-isopropylmalate synthase                               | ( SA1862 or SA0837 )                                                       |
| IZPN     | imidazolonepropionase                                    | SA2121                                                                     |
| KARA1i   | acetohydroxy acid isomeroeductase                        | SA1861                                                                     |
| KARA2i   | ketol-acid reductoisomerase (2-Aceto-2-hydroxybutanoate) | SA1861                                                                     |
| KAS1     | b-ketoacyl synthetase (Iso-C14:0)                        | ( SA0842 and SA0843 )                                                      |
| KAS10    | b-ketoacyl synthetase (Anteiso-C17:1)                    | ( SA0842 and SA0843 )                                                      |
| KAS11    | b-ketoacyl synthetase (Iso-C17:0)                        | ( SA0842 and SA0843 )                                                      |
| KAS12    | b-ketoacyl synthetase (Anteiso-C17:0)                    | ( SA0842 and SA0843 )                                                      |
| KAS13    | b-ketoacyl synthetase (octadecanoate)                    | ( SA0842 and SA0843 )                                                      |
| KAS14    | b-ketoacyl synthase                                      | ( SA0842 and SA0843 )                                                      |
| KAS15    | b-ketoacyl synthase                                      | ( SA0842 and SA0843 )                                                      |
| KAS16    | 3-hydroxy-myristoyl-ACP synthesis                        | ( ( SA1074 or SA0122 or SA2260 ) and ( SA0842 and SA0843 ) )               |
| KAS17    | b-ketoacyl synthetase (n-C18:1)                          | ( SA0842 and SA0843 )                                                      |
| KAS19SA  | b-ketoacyl synthetase (Anteiso-C19:0)                    | ( SA0842 and SA0843 )                                                      |
| KAS2     | b-ketoacyl synthetase (n-C14:0)                          | ( SA0842 and SA0843 )                                                      |
| KAS20SA  | b-ketoacyl synthetase (C20:0)                            | ( SA0842 and SA0843 )                                                      |
| KAS3     | b-ketoacyl synthetase (Iso-C15:0)                        | ( SA0842 and SA0843 )                                                      |
| KAS4     | b-ketoacyl synthetase (Anteiso-C15:0)                    | ( SA0842 and SA0843 )                                                      |
| KAS5     | b-ketoacyl synthetase (Iso-C16:1)                        | ( SA0842 and SA0843 )                                                      |
| KAS6     | b-ketoacyl synthetase (Iso-C16:0)                        | ( SA0842 and SA0843 )                                                      |
| KAS7     | b-ketoacyl synthetase (n-C16:1)                          | ( SA0842 and SA0843 )                                                      |
| KAS8     | b-ketoacyl synthetase (palmitate, n-C16:0)               | ( SA0842 and SA0843 )                                                      |
| KAS9     | b-ketoacyl synthetase (iso-C17:1)                        | ( SA0842 and SA0843 )                                                      |
| Kabc     | Potassium ABC transporter                                | ( ( SA1881 or SA0068 ) and ( SA1880 or SA0070 ) and ( SA1879 or SA0071 ) ) |
| Ki2r     | potassium reversible transport via proton symport        | SA0939                                                                     |
| L-LACi2r | L-lactate reversible transport via proton symport        | ( SA2156 or SA0106 )                                                       |
| LACpts   | Lactose transport via PEP:Pyr PTS                        | ( SA1992 and SA1993 )                                                      |
| LDH_D    | D-lactate dehydrogenase                                  | ( SA2312 or SA2346 )                                                       |
| LDH_L    | L-lactate dehydrogenase                                  | ( SA0232 or SA2395 )                                                       |
| LEUTA    | leucine transaminase                                     | SA0512                                                                     |
| LEUabc   | L-leucine transport via ABC system                       |                                                                            |
| LEUi2r   | L-leucine reversible transport via proton symport        | ( SA0180 or SA1239 )                                                       |
| LYSDC    | lysine decarboxylase                                     | SA0439                                                                     |
| LYSTRS   | Lysyl-tRNA synthetase                                    | SA0475                                                                     |
| LYSabc   | L-lysine transport via ABC system                        | ( SA1169 or SA1505 )                                                       |
| LYSi2r   | L-lysine reversible transport via proton symport         | ( SA1169 or SA1505 )                                                       |
| M1PD     | mannitol-1-phosphate 5-dehydrogenase                     | SA1963                                                                     |
| MACPD    | Malonyl-ACP decarboxylase                                | SA0843                                                                     |
| MALT     | alpha-glucosidase                                        | SA1338                                                                     |
| MALTAT   | maltose O-acetyltransferase                              | SA2342                                                                     |
| MALTabc  | maltose transport via ABC system                         | ( SA0207 and SA0208 and SA0209 and SA0206 )                                |
| MAN6PI   | mannose-6-phosphate isomerase                            | ( SA1945 or SA2435 )                                                       |
| MANpts   | D-mannose transport via PEP:Pyr PTS                      | SA2434                                                                     |
| MCOATA   | Malonyl-CoA-ACP transacylase                             | SA1073                                                                     |
| MDH      | malate dehydrogenase                                     |                                                                            |
| MDH2     | Malate dehydrogenase (ubiquinone 8 as acceptor)          | SA2155                                                                     |
| MDH3     | Malate dehydrogenase (menaquinone 8 as acceptor)         | SA2400                                                                     |
| MDRPD    | 5-Methylthio-5-deoxy-D-ribose 1-phosphate dehydratase    |                                                                            |
| ME1_rev  | malic enzyme                                             | SA1524                                                                     |
| MEPCT    | 2-C-methyl-D-erythritol 4-phosphate cytidyltransferase   | ( SA0241 or SA0245 )                                                       |
| METAT    | methionine adenosyltransferase                           | SA1608                                                                     |
| METS     | methionine synthase                                      | ( SA0345 and SA0344 )                                                      |

|                      |                                                                        |                                                                                                                                                                   |
|----------------------|------------------------------------------------------------------------|-------------------------------------------------------------------------------------------------------------------------------------------------------------------|
| METTRS               | Methionyl-tRNA synthetase                                              | (( SA1059 or SA0909 ) or SA0448 )                                                                                                                                 |
| METabc               | L-methionine transport via ABC system                                  |                                                                                                                                                                   |
| MEVK1                | mevalonate kinase (atp)                                                | SA0547                                                                                                                                                            |
| MEVK2                | mevalonate kinase (ctp)                                                | SA0547                                                                                                                                                            |
| MEVK3                | mevalonate kinase (gtp)                                                | SA0547                                                                                                                                                            |
| MEVK4                | mevalonate kinase (utp)                                                | SA0547                                                                                                                                                            |
| MG2abc               | magnesium transport via ABC system                                     | SA2166                                                                                                                                                            |
| MHPGLUT              | 5-methyltetrahydropteroyltriglutamate-homocysteine S-methyltransferase | SA0344                                                                                                                                                            |
| MI1PP                | myo-inositol 1-phosphatase                                             | SA0958                                                                                                                                                            |
| MNLpts               | mannitol transport via PEP:Pyruvate PTS                                | (( SA1962 and SA1960 )                                                                                                                                            |
| MNabc                | manganese transport via ABC system                                     | (( SA2194 or ( SA0587 and SA0589 and SA0588 ) or ( SA1385 and SA1384 ) )                                                                                          |
| MNi2                 | manganese transport in via proton symport                              | SA0956                                                                                                                                                            |
| MOBDabc              | molybdate transport via ABC system                                     | (( SA2074 and SA2073 and SA2072 )                                                                                                                                 |
| MOHMT                | 3-methyl-2-oxobutanoate hydroxymethyltransferase                       | SA2392                                                                                                                                                            |
| MTAN                 | methylthioadenosine nucleosidase                                       | SA1427                                                                                                                                                            |
| MTHFC                | methylenetetrahydrofolate cyclohydrolase                               | SA1553                                                                                                                                                            |
| MTHFD                | methylenetetrahydrofolate dehydrogenase (NADP)                         | SA0915                                                                                                                                                            |
| MTHFR2               | 5,10-methylenetetrahydrofolate reductase (NADH)                        |                                                                                                                                                                   |
| MTRI                 | 5-methylthioribose-1-phosphate isomerase                               |                                                                                                                                                                   |
| MTRK                 | 5-methylthioribose kinase                                              |                                                                                                                                                                   |
| NACUP                | Nicotinic acid uptake                                                  |                                                                                                                                                                   |
| NADH10               | NADH dehydrogenase (menaquinone-8 & 0 protons)                         | (( SA0411 and SA0578 and SA0799 and SA0802 and SA0813 and SA1598 )                                                                                                |
| NADH5                | NADH dehydrogenase (ubiquinone-8 )                                     | (( SA0411 and SA0578 and SA0799 and SA0802 and SA0813 and SA1598 )                                                                                                |
| NADH6                | NADH dehydrogenase (ubiquinone-8 & 3.5 protons)                        | (( SA0411 and SA0578 and SA0799 and SA0802 and SA0813 and SA1598 )                                                                                                |
| NADH7                | NADH dehydrogenase (menaquinone-8 & 2 protons)                         | (( SA0411 and SA0578 and SA0799 and SA0802 and SA0813 and SA1598 )                                                                                                |
| NADH8                | NADH dehydrogenase (demethylmenaquinone-8 & 2.8 protons)               | (( SA0411 and SA0578 and SA0799 and SA0802 and SA0813 and SA1598 )                                                                                                |
| NADH9                | NADH dehydrogenase (demethylmenaquinone-8 & 0 protons)                 | (( SA0411 and SA0578 and SA0799 and SA0802 and SA0813 and SA1598 )                                                                                                |
| NADK                 | NAD kinase                                                             | SA0865                                                                                                                                                            |
| NADS1                | NAD synthase (nh3)                                                     | SA1728                                                                                                                                                            |
| NALN6                | NALN6                                                                  | (( SA0902 or SA1544 )                                                                                                                                             |
| NAPRTr               | NAPRTase (rev)                                                         | SA1729                                                                                                                                                            |
|                      |                                                                        |                                                                                                                                                                   |
| Na <sub>t3</sub>     | sodium transport out via proton antiport                               | (( SA0813 and ( SA0812 or SA0579 ) and ( SA0811 or SA0580 ) and ( SA0810 or SA0581 ) and ( SA0809 or SA0582 ) and ( SA0808 or SA0583 ) and ( SA0807 or SA0584 ) ) |
| Na <sub>t3_1</sub>   | sodium proton antiporter (H:Na is 1:1)                                 | (( SA2117 or SA2094 )                                                                                                                                             |
| Na <sub>t3_1.5</sub> | sodium proton antiporter (H:Na is 1.5)                                 | (( SA2228 or SA0804 or SA0585 )                                                                                                                                   |
| Na <sub>t3_2</sub>   | sodium proton antiporter (H:Na is 2)                                   | (( SA2228 or SA0804 or SA0585 )                                                                                                                                   |
| NBAH                 | N-Benzoylglycine amidohydrolase                                        | SA1230                                                                                                                                                            |
| NCAMUP               | Nicotinamide acid uptake                                               |                                                                                                                                                                   |
| NDPK1                | nucleoside-diphosphate kinase (ATP:GDP)                                | SA1301                                                                                                                                                            |
| NDPK2                | nucleoside-diphosphate kinase (ATP:UDP)                                | SA1301                                                                                                                                                            |
| NDPK3                | nucleoside-diphosphate kinase (ATP:CDP)                                | SA1301                                                                                                                                                            |
| NDPK4                | nucleoside-diphosphate kinase (ATP:dTDP)                               | SA1301                                                                                                                                                            |
| NDPK5                | nucleoside-diphosphate kinase (ATP:dGDP)                               | SA1301                                                                                                                                                            |
| NDPK6                | nucleoside-diphosphate kinase (ATP:dUDP)                               | SA1301                                                                                                                                                            |
| NDPK7                | nucleoside-diphosphate kinase (ATP:dCDP)                               | SA1301                                                                                                                                                            |
| NDPK8                | nucleoside-diphosphate kinase (ATP:dADP)                               | SA1301                                                                                                                                                            |
| NDPK9                | nucleoside-diphosphate kinase (ATP:IDP)                                | SA1301                                                                                                                                                            |
| NH4OHDs              | NH4OH dissociation                                                     |                                                                                                                                                                   |
| NH4t4                | ammonium transport out via K <sup>+</sup> antiport                     | SA1848                                                                                                                                                            |
| Niabc                | nickel transport via ABC system                                        | (( SA2489 or ( SA0228 and SA0229 and SA0230 ) )                                                                                                                   |
| NNAM                 | nicotinamidase                                                         | SA1734                                                                                                                                                            |
| NNATr                | nicotinate-nucleotide adenyltransferase                                | SA1422                                                                                                                                                            |
| NO2t2r               | nitrite transport in via proton symport, reversible                    | SA0293                                                                                                                                                            |



|            |                                                                              |                                             |
|------------|------------------------------------------------------------------------------|---------------------------------------------|
| NO3R1      | Nitrate reductase (Ubiquinol-8)                                              | ( SA2185 and SA2184 and SA2183 and SA2182 ) |
| NO3R2      | Nitrate reductase (Menaquinol-8)                                             | ( SA2185 and SA2184 and SA2183 and SA2182 ) |
| NO3t7      | nitrate transport in via nitrite antiport                                    | SA2176                                      |
| NOPD       | D-nopaline dehydrogenase                                                     | SA2095                                      |
| NPHSr      | naphthoate synthase (reversible)                                             | SA0898                                      |
| NTRIRx     | nitrite reductase (NADH)                                                     | ( SA2188 and SA2187 )                       |
| NTRIRy     | nitrite reductase (NADPH)                                                    | ( SA2188 and SA2187 )                       |
| O2t5i      | O2 transport in via diffusion                                                |                                             |
| OCBT       | ornithine carbamoyltransferase                                               | ( SA2427 or SA1012 )                        |
| OCTD       | D-octopine dehydrogenase                                                     | SA2095                                      |
| OIVD1      | 2-oxoisovalerate dehydrogenase (acylating; 4-methyl-2-oxopentanoate)         | ( SA1348 and SA1347 and SA1346 )            |
| OIVD2      | 2-oxoisovalerate dehydrogenase (acylating; 3-methyl-2-oxobutanoate)          | ( SA1348 and SA1347 and SA1346 )            |
| OIVD3      | 2-oxoisovalerate dehydrogenase (acylating; 3-methyl-2-oxopentanoate)         | ( SA1348 and SA1347 and SA1346 )            |
| OMCDC      | 2-Oxo-4-methyl-3-carboxypentanoate decarboxylation                           | SA1863                                      |
| OMPDC      | orotidine-5'-phosphate decarboxylase                                         | SA1047                                      |
| OR2r       | 2-oxoglutarate synthase (rev)                                                | ( SA1131 and SA1132 )                       |
| ORNCD      | ornithine cyclodeaminase                                                     | SA0113                                      |
| ORNDC      | Ornithine Decarboxylase                                                      | SA0439                                      |
| ORNTA      | ornithine transaminase                                                       | SA0818                                      |
| ORNTAC     | ornithine transacetylase                                                     | SA0177                                      |
| ORNabc     | ornithine transport via ABC system                                           | ( SA2200 and SA2201 and SA2202 )            |
| ORPT       | orotate phosphoribosyltransferase                                            | SA1048                                      |
| P5CD       | 1-pyrroline-5-carboxylate dehydrogenase                                      | SA2341                                      |
| P5CR       | pyrroline-5-carboxylate reductase                                            | SA1334                                      |
| PALASA_SA2 | Phosphatidylalanine Synthase (SA) 2                                          |                                             |
| PANTS      | pantothenate synthase                                                        | SA2391                                      |
| PAPA_SA    | Phosphatidate phosphatase                                                    |                                             |
| PAPPT3     | phospho-N-acetylmuramoyl-pentapeptide-transferase (meso-2,6-diaminopimelate) | SA1025                                      |
| PAPSR      | phosphoadenylyl-sulfate reductase (thioredoxin)                              |                                             |
| PASYN_SA   | Phosphatidic acid synthase (Saureus)                                         |                                             |
| PC         | pyruvate carboxylase                                                         | SA0963                                      |
| PDH        | pyruvate dehydrogenase                                                       | ( SA0944 and SA0945 and SA0946 )            |
| PDHcr      | Pyruvate dehydrogenase (dihydrolipoamide dehydrogenase) reversible           | ( SA1349 or SA0946 )                        |
| PFK        | phosphofructokinase                                                          | SA1521                                      |
| PFK_2      | Phosphofructokinase                                                          | SA1995                                      |
| PFLr       | pyruvate formate lyase                                                       | SA0218                                      |
| PGAMT      | phosphoglucosamine mutase                                                    | SA1965                                      |
| PGCD       | phosphoglycerate dehydrogenase                                               | SA1545                                      |
| PGI        | glucose-6-phosphate isomerase                                                | SA0823                                      |
| PGK        | phosphoglycerate kinase                                                      | SA0728                                      |
| PGLYCP     | Phosphoglycolate phosphatase                                                 | SA0513                                      |
| PGLYSA_SA2 | Phosphatidylglycine Synthase (SA) 2                                          |                                             |
| PGM        | phosphoglycerate mutase                                                      | ( SA0361 or SA0730 or SA2204 )              |
| PGMT       | phosphoglucomutase                                                           | SA1965                                      |
| PGPP_SA    | Phosphatidylglycerol phosphate phosphatase (Saureus)                         | SA1250                                      |
| PGSA_SA    | Phosphatidylglycerol synthase (Saureus)                                      | SA1126                                      |
| PHETA1     | phenylalanine transaminase                                                   | ( SA0679 or SA2469 )                        |
| PHET2r     | L-phenylalanine reversible transport via proton symport                      |                                             |
| Plabc      | phosphate transport via ABC system                                           | ( SA1221 and SA1219 and SA1220 and SA1218 ) |
| Plt7       | phosphate transport in/out via three Na+ symporter                           | SA0100                                      |
| PLEUSA_SA2 | Phosphatidylleucine Synthase (SA) 2                                          |                                             |
| PLYSSA_SA2 | Phosphatidyllysine Synthase (SA) 2                                           |                                             |
| PMANM      | phosphomannomutase                                                           | SA2279                                      |

|           |                                                                                                                  |                                                                        |
|-----------|------------------------------------------------------------------------------------------------------------------|------------------------------------------------------------------------|
| PMDPHT    | pyrimidine phosphatase                                                                                           | ( SA1588 and SA1586 )                                                  |
| PMEVK     | phosphomevalonate kinase                                                                                         | SA0549                                                                 |
| PMPK      | phosphomethylpyrimidine kinase                                                                                   | ( SA0537 or SA1896 )                                                   |
| PNTK      | pantothenate kinase                                                                                              | SA1439                                                                 |
| POX       | pyruvate oxidase                                                                                                 | SA2327                                                                 |
| POX2      | Pyruvate Oxidase (2)                                                                                             | SA2327                                                                 |
| PPA       | inorganic diphosphatase                                                                                          | SA1735                                                                 |
| PPBNGS    | porphobilinogen synthase                                                                                         | SA1492                                                                 |
| PPCDC     | phosphopantothenoylcysteine decarboxylase                                                                        | SA1054                                                                 |
| PPCK      | phosphoenolpyruvate carboxykinase                                                                                | SA1609                                                                 |
| PPM       | phosphopentomutase                                                                                               | SA0134                                                                 |
| PPM2      | phosphopentomutase 2 (deoxyribose)                                                                               | SA0134                                                                 |
| PPNCL2    | phosphopantothenate-cysteine ligase                                                                              | SA1054                                                                 |
| PPND      | prephenate dehydrogenase                                                                                         | SA1197                                                                 |
| PPNDH     | prephenate dehydratase                                                                                           | SA1731                                                                 |
| PPPGO     | protoporphyrinogen oxidase                                                                                       | SA1650                                                                 |
| PRAGS     | phosphoribosylglycinamide synthetase                                                                             | SA0926                                                                 |
| PRAI      | phosphoribosylanthranilate isomerase                                                                             | SA1203                                                                 |
| PRAIS     | phosphoribosylaminoimidazole synthase                                                                            | SA0923                                                                 |
| PRAMPC    | phosphoribosyl-AMP cyclohydrolase                                                                                | SA2464                                                                 |
| PRASCS    | phosphoribosylaminoimidazolesuccinocarboxamide synthase                                                          | SA0918                                                                 |
| PRATPP    | phosphoribosyl-ATP pyrophosphatase                                                                               | SA2464                                                                 |
| PRFGS     | phosphoribosylformylglycinamide synthase                                                                         | ( SA0921 and SA0920 and SA0919 )                                       |
| PRMICli   | 1-(5-phosphoribosyl)-5-[(5-phosphoribosylamino)methylideneamino]imidazole-4-carboxamide isomerase (irreversible) | SA2466                                                                 |
| PROD2     | Proline dehydrogenase                                                                                            | SA1585                                                                 |
| PROabc    | L-proline transport via ABC system                                                                               | (( SA2237 and SA2236 and SA2235 and SA2234 ) or ( SA0678 and SA0677 )) |
| PRO4      | Na+/Proline-L symporter                                                                                          | SA1718                                                                 |
| PRPPS     | phosphoribosylpyrophosphate synthetase                                                                           | SA0458                                                                 |
| PSCVT     | 3-phosphoshikimate 1-carboxyvinyltransferase                                                                     | SA1297                                                                 |
| PSD_SA    | Phosphatidylserine decarboxylase (Saureus)                                                                       |                                                                        |
| PSERT     | phosphoserine transaminase                                                                                       |                                                                        |
| PSP_L     | phosphoserine phosphatase (L-serine)                                                                             |                                                                        |
| PSSA_SA   | Phosphatidylserine syntase (Saureus)                                                                             |                                                                        |
| PTAr      | phosphotransacetylase                                                                                            | SA0545                                                                 |
| PTHPS     | 6-pyruvoyltetrahydropterin synthase                                                                              | SA0666                                                                 |
| PTPATi    | pantetheine-phosphate adenyllyltransferase                                                                       | SA0973                                                                 |
| PTRCORNT7 | putrescine/ornithine antiporter                                                                                  | SA1270                                                                 |
| PUNP1     | purine-nucleoside phosphorylase (Adenosine)                                                                      | ( SA1940 or SA0131 )                                                   |
| PUNP2     | purine-nucleoside phosphorylase (Deoxyadenosine)                                                                 | ( SA1940 or SA0131 )                                                   |
| PYK       | pyruvate kinase                                                                                                  | SA1520                                                                 |
| PYNP1     | pyrimidine-nucleoside phosphorylase (cytosine)                                                                   | SA1938                                                                 |
| PYRZAM    | Pyrazinamidase                                                                                                   | SA1734                                                                 |
| RAFH      | raffinose hydrolyzing enzyme                                                                                     | SA1846                                                                 |
| RBFK      | riboflavin kinase                                                                                                | SA1115                                                                 |
| RBFSa     | riboflavin synthase                                                                                              | SA1588                                                                 |
| RBFsb     | riboflavin synthase                                                                                              | SA1586                                                                 |
| RBK       | ribokinase                                                                                                       | SA0258                                                                 |
| RBK_L1    | L-ribulokinase (L-ribulose)                                                                                      | SA0510                                                                 |
| RIBabc    | D-ribose transport via ABC system                                                                                | ( SA0259 and SA0260 )                                                  |
| RNDR1     | ribonucleoside-diphosphate reductase (ADP)                                                                       | ( SA0686 and SA0687 )                                                  |
| RNDR2     | ribonucleoside-diphosphate reductase (GDP)                                                                       | ( SA0686 and SA0687 )                                                  |
| RNDR3     | ribonucleoside-diphosphate reductase (CDP)                                                                       | ( SA0686 and SA0687 )                                                  |
| RNDR4     | ribonucleoside-diphosphate reductase (UDP)                                                                       | ( SA0686 and SA0687 )                                                  |

|              |                                                                |                                                                                                                                                                 |
|--------------|----------------------------------------------------------------|-----------------------------------------------------------------------------------------------------------------------------------------------------------------|
| RNTR1        | ribonucleoside-triphosphate reductase (ATP)                    | SA2410                                                                                                                                                          |
| RNTR2        | ribonucleoside-triphosphate reductase (GTP)                    | SA2410                                                                                                                                                          |
| RNTR3        | ribonucleoside-triphosphate reductase (CTP)                    | SA2410                                                                                                                                                          |
| RNTR4        | ribonucleoside-triphosphate reductase (UTP)                    | SA2410                                                                                                                                                          |
| RPE          | ribulose 5-phosphate 3-epimerase                               | SA1065                                                                                                                                                          |
| RPI          | ribose-5-phosphate isomerase                                   | SA2127                                                                                                                                                          |
| S3AdT        | streptomycin 3'-adenyltransferase                              | ( SA2385 or SA1952 or SA1481 or SA0765 or SA0049 )                                                                                                              |
| S7PIr        | sedoheptulose 7-phosphate isomerase (reversible)               | SA0306                                                                                                                                                          |
| SADT2        | Sulfate adenyltransferase                                      | SA0506                                                                                                                                                          |
| SALCpts      | salicin transport via PEP:Pyr PTS                              | SA0255                                                                                                                                                          |
| SBTD_Dr      | D-sorbitol dehydrogenase (R)                                   | ( SA0239 or SA0240 )                                                                                                                                            |
| SDPDS        | succinyl-diaminopimelate desuccinylase                         | ( SA1572 or SA1814 )                                                                                                                                            |
| SDPTA        | succinyl-diaminopimelate transaminase                          | SA2347                                                                                                                                                          |
| SERAT        | serine O-acetyltransferase                                     | SA0487                                                                                                                                                          |
| SERD_Lr      | L-serine deaminase (rev)                                       | ( SA2318 and SA2319 )                                                                                                                                           |
| SERTRS       | Seryl-tRNA synthetase                                          | SA0009                                                                                                                                                          |
| SERabc       | L-serine transport via ABC system                              | ( SA1519 and SA2226 and SA2227 )                                                                                                                                |
| SHCHCS2      | 2-succinyl-6-hydroxy-2,4-cyclohexadiene 1-carboxylate synthase | SA0896                                                                                                                                                          |
| SHCHD2       | sirohydrochlorin dehydrogenase (NAD)                           | SA2412                                                                                                                                                          |
| SHCHF        | sirohydrochlorin ferrochetalase                                | SA2412                                                                                                                                                          |
| SHK3Dr       | shikimate dehydrogenase                                        | SA1424                                                                                                                                                          |
| SHKK         | shikimate kinase                                               | SA1368                                                                                                                                                          |
| SHSL1        | O-succinylhomoserine lyase (L-cysteine)                        | SA0347                                                                                                                                                          |
| SHSL4r       | O-succinylhomoserine lyase (elimination), reversible           | SA0419                                                                                                                                                          |
| SPMDabc      | spermidine transport via ABC system                            | ( SA0950 and SA0951 and SA0952 and SA0953 )                                                                                                                     |
| SPMS         | spermidine synthase                                            |                                                                                                                                                                 |
| SPODM        | superoxide dismutase                                           | ( SA1382 or SA0128 )                                                                                                                                            |
| SQLS         | Squalene synthase                                              | SA2348                                                                                                                                                          |
| SSALy        | succinate-semialdehyde dehydrogenase (NADP)                    | SA1924                                                                                                                                                          |
| SUCBZL       | o-succinylbenzoate-CoA ligase                                  | SA1615                                                                                                                                                          |
| SUCBZS       | O-succinylbenzoate-CoA synthase                                | SA1614                                                                                                                                                          |
| SUCD1        | succinate dehydrogenase                                        | ( SA0995 and SA0996 and SA0994 )                                                                                                                                |
| SUCD4        | succinate dehydrogenase                                        | ( SA0995 and SA0996 and SA0994 )                                                                                                                                |
| SUCOAS       | succinyl-CoA synthetase (ADP-forming)                          | ( SA1088 and SA1089 )                                                                                                                                           |
| SUCR         | sucrose hydrolyzing enzyme                                     | SA1846                                                                                                                                                          |
| SUCpts       | sucrose transport via PEP:Pyr PTS                              | SA2167                                                                                                                                                          |
| SULR         | sulfite reductase (NADPH2)                                     | SA2413                                                                                                                                                          |
| SULabc       | sulfate transport via ABC system                               |                                                                                                                                                                 |
| Spt3AdT      | spectinomycin 3'-adenyltransferase                             | ( SA2385 or SA1952 or SA1481 or SA0765 or SA0049 )                                                                                                              |
| TAGO         | Tag O reaction for initiation of teichoic acid                 |                                                                                                                                                                 |
| TALA         | transaldolase                                                  | SA1599                                                                                                                                                          |
| TECA1S       | glycerol teichoic acid synthesis (no sub, n=25)                | ( SA0592 and ( SA0522 or SA0523 ) and ( SA0243 or SA0595 ) and SA0597 and SA0244 and SA0594 and SA0593 and SA0596 )                                             |
| TECA2S       | glycerol teichoic acid synthesis (D-ala, n=25)                 | ( SA0793 and SA0794 and SA0795 and SA0796 and SA0592 and ( SA0522 or SA0523 ) and ( SA0243 or SA0595 ) and SA0597 and SA0244 and SA0594 and SA0593 and SA0596 ) |
| TECA3S       | glycerol teichoic acid synthesis (n=25, glucose sub)           | ( SA0592 and ( SA0522 or SA0523 ) and ( SA0243 or SA0595 ) and SA0597 and SA0244 and SA0594 and SA0593 and SA0596 )                                             |
| TECA4S       | minor teichoic acid synthesis (n=30)                           | ( SA0592 and ( SA0522 or SA0523 ) and ( SA0243 or SA0595 ) and SA0597 and SA0244 and SA0594 and SA0593 and SA0596 )                                             |
| TEST_NADTRHD | NAD transhydrogenase                                           |                                                                                                                                                                 |
| TGBPA        | Tagatose-bisphosphate aldolase                                 | SA1994                                                                                                                                                          |
| THDPS        | tetrahydrodipicolinate succinylase                             | SA1229                                                                                                                                                          |
| THFGLUS      | Tetrahydrofolate:L-glutamate gamma-ligase (ADP-forming)        | SA1487                                                                                                                                                          |

|                   |                                                                                                                   |                                                                              |
|-------------------|-------------------------------------------------------------------------------------------------------------------|------------------------------------------------------------------------------|
| THMDt2            | thymidine transport in via proton symport                                                                         |                                                                              |
| THMDt4            | thymidine transport in via sodium symport                                                                         | ( SA0302 or SA0479 or SA0600 )                                               |
| THMabc            | thiamine transport via ABC system                                                                                 |                                                                              |
| THRAr             | Threonine Aldolase                                                                                                | SA1154                                                                       |
| THRD_L            | L-threonine deaminase                                                                                             | ( SA1271 or SA1866 )                                                         |
| THRS              | threonine synthase                                                                                                | SA1165                                                                       |
| THRTRS            | Threonyl-tRNA synthetase                                                                                          | SA1506                                                                       |
| THRT2             | L-threonine transport in via proton symport                                                                       |                                                                              |
| TKT1              | transketolase                                                                                                     | SA1177                                                                       |
| TKT2              | transketolase                                                                                                     | SA1177                                                                       |
| TMDK1             | thymidine kinase (ATP:thymidine)                                                                                  | SA1921                                                                       |
| TMDS              | thymidylate synthase                                                                                              | ( SA1260 or SA0311 )                                                         |
| TMPPP             | thiamine-phosphate diphosphorylase                                                                                | SA1894                                                                       |
| TPI               | triose-phosphate isomerase                                                                                        | SA0729                                                                       |
| TRDR              | thioredoxin reductase (NADPH)                                                                                     | ( SA2162 or SA0719 )                                                         |
| TRE6PH            | trehalose-6-phosphate hydrolase                                                                                   | SA0433                                                                       |
| TREpts            | trehalose transport via PEP:Pyr PTS                                                                               | SA0432                                                                       |
| TRPS1             | tryptophan synthase (indoleglycerol phosphate)                                                                    | ( SA1204 and SA1205 )                                                        |
| TRPI2r            | L-tryptophan reversible transport via proton symport                                                              |                                                                              |
| TYRTA             | tyrosine transaminase                                                                                             | ( SA0679 or SA2469 )                                                         |
| TYRI2r            | L-tyrosine reversible transport via proton symport                                                                |                                                                              |
| UAAGDS            | UDP-N-acetylmuramoyl-L-alanyl-D-glutamyl-meso-2,6-diaminopimelate synthetase                                      | ( SA0876 or SA1708 )                                                         |
| UAG2E             | UDP-N-acetylglucosamine 2-epimerase                                                                               | ( SA1913 or ( SA0159 or SA0150 ) )                                           |
| UAG2EMA           | UDP-N-acetyl-D-glucosamine 2-epimerase (Hydrolysis)                                                               | ( SA1913 or ( SA0159 or SA0150 ) )                                           |
| UAG4E             | UDP-N-acetylglucosamine 4-epimerase                                                                               |                                                                              |
| UAGCVT            | UDP-N-acetylglucosamine 1-carboxyvinyltransferase                                                                 | ( SA1902 or SA1926 )                                                         |
| UAGDP             | UDP-N-acetylglucosamine diphosphorylase                                                                           | ( SA1974 or SA0457 )                                                         |
| UAGPT3            | UDP-N-acetylglucosamine-N-acetylmuramyl-(pentapeptide)pyrophosphoryl-undecaprenol N-acetylglucosamine transferase | SA1251                                                                       |
| UAMAGS            | UDP-N-acetylmuramoyl-L-alanyl-D-glutamate synthetase                                                              | SA1026                                                                       |
| UAMAS             | UDP-N-acetylmuramoyl-L-alanine synthetase                                                                         | SA1561                                                                       |
| UAPGR             | UDP-N-acetylenolpyruvoylglucosamine reductase                                                                     | SA0693                                                                       |
| UDCPKr            | undecaprenol kinase (reversible)                                                                                  | SA0638                                                                       |
| UDPDPS            | undecaprenyl-diphosphate synthase                                                                                 | SA1103                                                                       |
| UDPG12dgrGT_SA2   | UDPglucose:1,2-diacylglycerol 3-D-glucosyltransferase                                                             |                                                                              |
| UDPG3g12dgrGT_SA2 | UDPglucose:3g12dgr 3-D-glucosyltransferase 2                                                                      |                                                                              |
| UDPG4E            | UDPglucose 4-epimerase                                                                                            | SA0123                                                                       |
| UGMDDS            | UDP-N-acetylmuramoyl-L-alanyl-D-glutamyl-meso-2,6-diaminopimeloyl-D-alanyl-D-alanine synthetase                   | SA1886                                                                       |
| UMPK              | UMP kinase                                                                                                        | SA1309                                                                       |
| UNK3              | 2-keto-4-methylthiobutyrate transamination                                                                        |                                                                              |
| UPP3MT            | uroporphyrinogen methyltransferase                                                                                | SA2186                                                                       |
| UPP3S             | uroporphyrinogen-III synthase                                                                                     | SA1493                                                                       |
| UPPDC1            | uroporphyrinogen decarboxylase (uroporphyrinogen III)                                                             | SA1652                                                                       |
| UPPDC2            | uroporphyrinogen decarboxylase (uroporphyrinogen I)                                                               | SA1652                                                                       |
| UPPRTTr           | uracil phosphoribosyltransferase (r)                                                                              | ( SA1041 or SA1914 )                                                         |
| URAt2             | uracil transport in via proton symport                                                                            | SA1042                                                                       |
| URCN              | urocanase                                                                                                         | SA2122                                                                       |
| UREA              | urease                                                                                                            | ( SA2082 and SA2084 and SA2083 and SA2088 and SA2085 and SA2086 and SA2087 ) |
| UREAt             | Urea transport via facilitate diffusion                                                                           | ( SA2081 or SA1140 )                                                         |
| URFGTT            | UDP-L-rhamnose:flavonol-3-O-D-glucoside L-rhamnosyltransferase                                                    | SA1303                                                                       |
| URIDK2r           | uridylate kinase (dUMP)                                                                                           | SA1101                                                                       |

|        |                                                  |                                                                         |
|--------|--------------------------------------------------|-------------------------------------------------------------------------|
| URIK1  | uridine kinase (ATP:Uridine)                     | SA1439                                                                  |
| URIK2  | uridine kinase (GTP:Uridine)                     | SA1439                                                                  |
| URIK3  | uridine kinase (ITP:Uridine)                     | SA1439                                                                  |
| URIt4  | uridine transport in via sodium symport          | ( SA0302 or SA0479 or SA0600 )                                          |
| VALTA  | valine transaminase                              | SA0512                                                                  |
| VALabc | L-valine transport via ABC system                |                                                                         |
| VALt2r | L-valine reversible transport via proton symport | ( SA0180 or SA1239 )                                                    |
| XANt   | xanthine reversible transport                    | SA0374                                                                  |
| XANt2  | xanthine transport in via proton symport         | SA0374                                                                  |
| XPPT   | xanthine phosphoribosyltransferase               | SA0373                                                                  |
| YUMPS  | yUMP synthetase                                  | ( SA1114 or ( SA1574 and SA2018 ) or SA1324 )                           |
| ZNabc  | zinc transport via ABC system                    | ( SA2194 or ( SA0587 and SA0589 and SA0588 ) or ( SA1385 and SA1384 ) ) |
