# Supplementary material for: Genome-scale reconstruction of the metabolic network in Staphylococcus aureus N315: an initial draft to the two-dimensional annotation
Source: PubMed Central journal article supplement (PMC1079855; doi:10.1186/1471-2180-5-8), 2005-03-07
Supplement: 1471-2180-5-8-S9.pdf [file 1471-2180-5-8-S9.pdf]

| <b>Reaction</b> | <b>Gene</b> | <b>Best E value</b> | <b>Organism (EC or BS)</b> |
|-----------------|-------------|---------------------|----------------------------|
| ACNAMt2         | SA0531      | 2.00E-19            | EC                         |
| ADMDCr          |             |                     |                            |
| ADNt2           |             |                     |                            |
| ADSK            | SA2456      | 3.80E-02            | BS                         |
| AGMHE           | SA0123      | 8.00E-17            | EC                         |
| AGMT            | SA1968      | 7.00E-23            | BS                         |
| ASNS1           | SA0922      | 6.00E-10            | BS                         |
| ASPabc          |             |                     |                            |
| ATPM            |             |                     |                            |
| BPNT            |             |                     |                            |
| BTN2i           |             |                     |                            |
| CDAPPA_SA       |             |                     |                            |
| CO2t            |             |                     |                            |
| CSNt2           |             |                     |                            |
| CYSabc          |             |                     |                            |
| DAPE            |             |                     |                            |
| DKMPPD          |             |                     |                            |
| DKMPPD2         |             |                     |                            |
| D-LACt2         |             |                     |                            |
| ETOHt           |             |                     |                            |
| GCALDD          | SA2406      | 2.00E-81            | EC                         |
| GLCS1           | SA1291      | 0.004               | BS                         |
| GLGC            | SA2288      | 0.001               | BS                         |
| GMHEPAT         | SA0597      | 8.00E-09            | EC                         |
| GMHEPK          | SA0597      | 8.00E-09            | EC                         |
| GMHEPPA         | SA0513      | 6.00E-17            | EC                         |
| GUAt2           |             |                     |                            |
| H2Ot            |             |                     |                            |
| HCO3E           | SA2287      | 0.046               | BS                         |
| HDCAt2          |             |                     |                            |
| HEMEti          |             |                     |                            |
| HISabc          |             |                     |                            |
| HISTP           |             |                     |                            |
| ILEabc          |             |                     |                            |
| KDOPS           | SA1558      | 2.00E-18            | EC                         |
| LEUabc          |             |                     |                            |
| MACPD           | SA0843      | 5.00E-59            | EC                         |
| MDH             |             |                     |                            |
| MDRPD           |             |                     |                            |
| METabc          |             |                     |                            |
| MTHFR2          |             |                     |                            |
| MTRI            |             |                     |                            |
| MTRK            |             |                     |                            |
| NACUP           |             |                     |                            |
| NCAMUP          |             |                     |                            |
| NH4OHDs         |             |                     |                            |
| O2t5i           |             |                     |                            |
| ORNabc          | SA2200      | 3.00E-61            | EC                         |
| ORNabc          | SA2201      | 3.00E-18            | EC                         |
| ORNabc          | SA2202      | 9.00E-18            | EC                         |

|                   |        |          |    |
|-------------------|--------|----------|----|
| PALASA_SA2        |        |          |    |
| PAPA_SA           |        |          |    |
| PAPSR             |        |          |    |
| PASYN_SA          |        |          |    |
| PGLYSA_SA2        |        |          |    |
| PGPP_SA           | SA1250 | 0.002    | EC |
| PHEt2r            |        |          |    |
| PLEUSA_SA2        |        |          |    |
| PLYSSA_SA2        |        |          |    |
| PNTK              | SA1439 | 5.00E-11 | BS |
| PSD_SA            |        |          |    |
| PSERT             |        |          |    |
| PSP_L             |        |          |    |
| PSSA_SA           |        |          |    |
| PTRCORNt7         | SA1270 | 2.00E-21 | EC |
| S7Pir             | SA0306 | 7.00E-04 | EC |
| SADT2             | SA0506 | 5.00E-21 | EC |
| SADT2             | SA0506 | 5.00E-21 | EC |
| SPMS              |        |          |    |
| SULabc            |        |          |    |
| TAGO              |        |          |    |
| TEST_NADTRHD      |        |          |    |
| THMabc            |        |          |    |
| THMDt2            |        |          |    |
| THRt2             |        |          |    |
| TRPt2r            |        |          |    |
| TYRt2r            |        |          |    |
| U23GAAT           | SA0457 | 6.00E-07 | EC |
| UAG4E             |        |          |    |
| UAGAAT            | SA0457 | 4.00E-05 | EC |
| UDPG12dgrGT_SA2   |        |          |    |
| UDPG3g12dgrGT_SA2 |        |          |    |
| UNK3              |        |          |    |
| USHD              | SA0022 | 4.00E-41 | EC |
| VALabc            |        |          |    |
